# Supplementary material for: Synthesis and Antibacterial, Antioxidant, and Molecular Docking Analysis of Some Novel Quinoline Derivatives
Source: Hindawi journal article supplement (doi:10.1155/2020/1324096), 2020-07-24

## Supplementary Information

Here are the  $^1\text{H}$  NMR and  $^{13}\text{C}$  NMR spectra of the synthesized compounds

**Figure 1:**  $^1\text{H}$ -NMR (400 MHz,  $\text{CDCl}_3$ ) spectrum of 2-chloroquinoline-3-carbaldehyde (**4**)

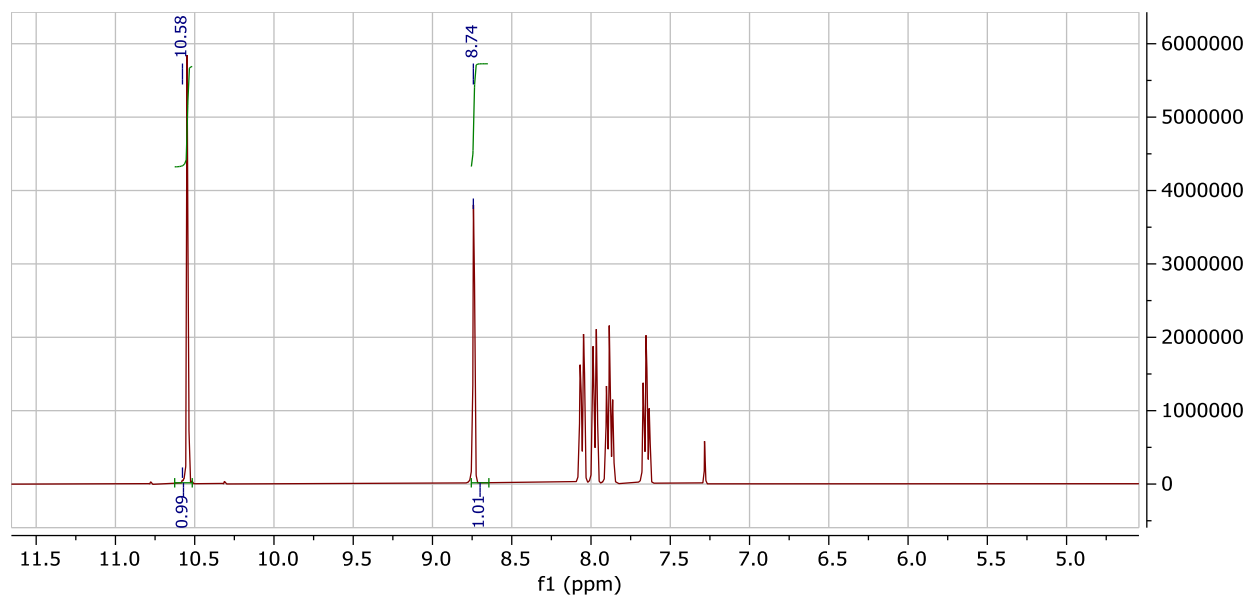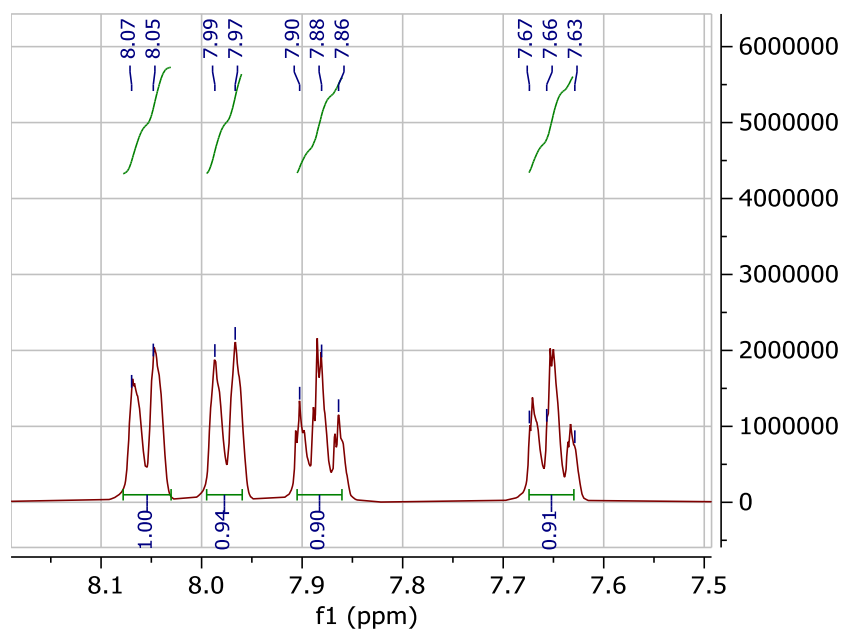

**Figure 2:**  $^{13}\text{C}$ -NMR (100 MHz,  $\text{CDCl}_3$ ) spectrum of 2-chloroquinoline-3-carbaldehyde (**4**)

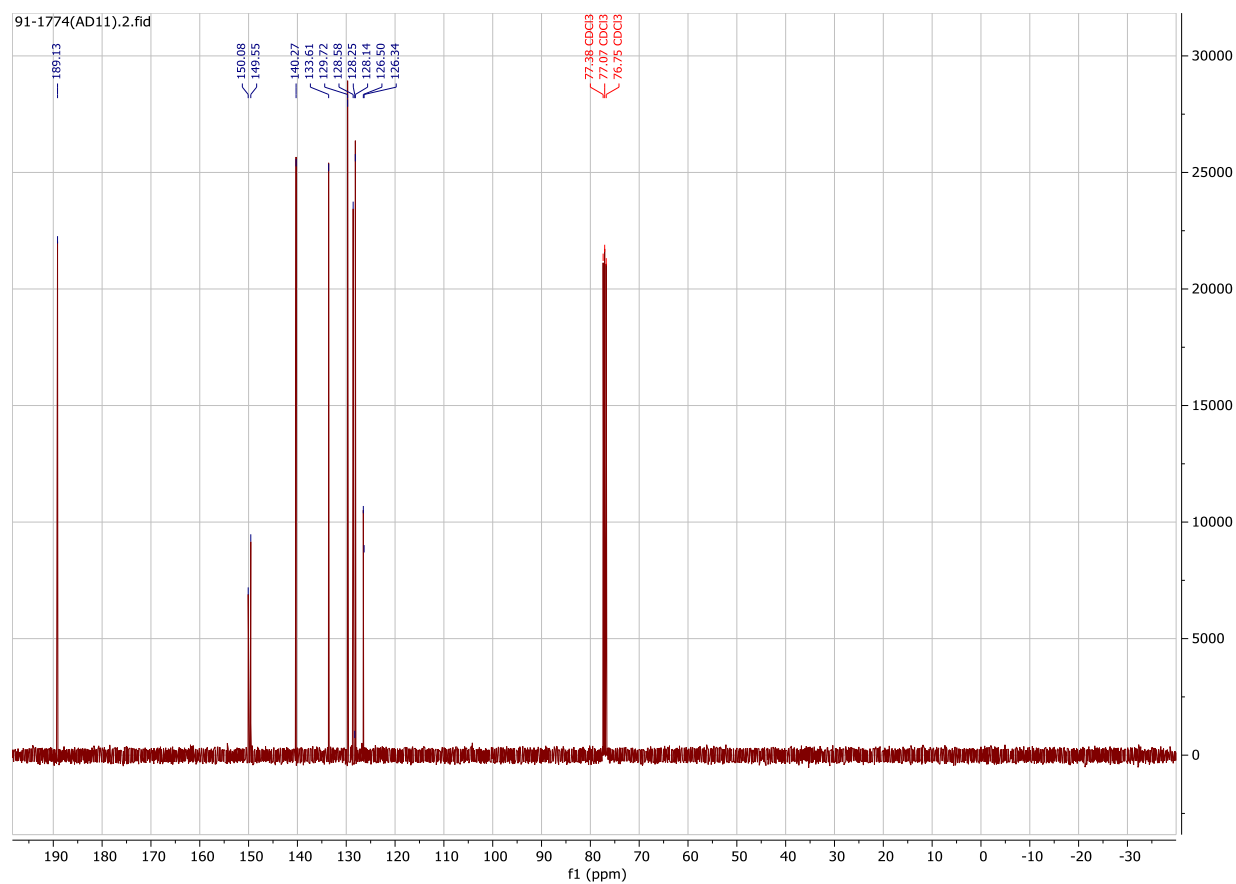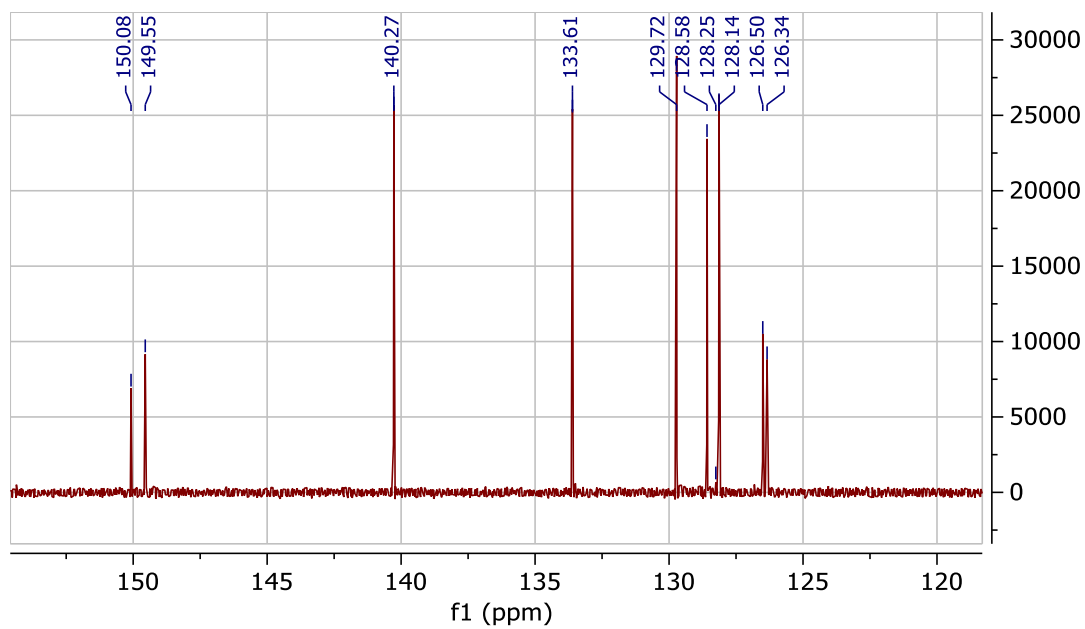

**Figure 3:**  $^1\text{H}$ - NMR (400 MHz,  $\text{CDCl}_3$ ) spectrum of 2-methoxyquinoline-3-carbaldehyde (**5**)

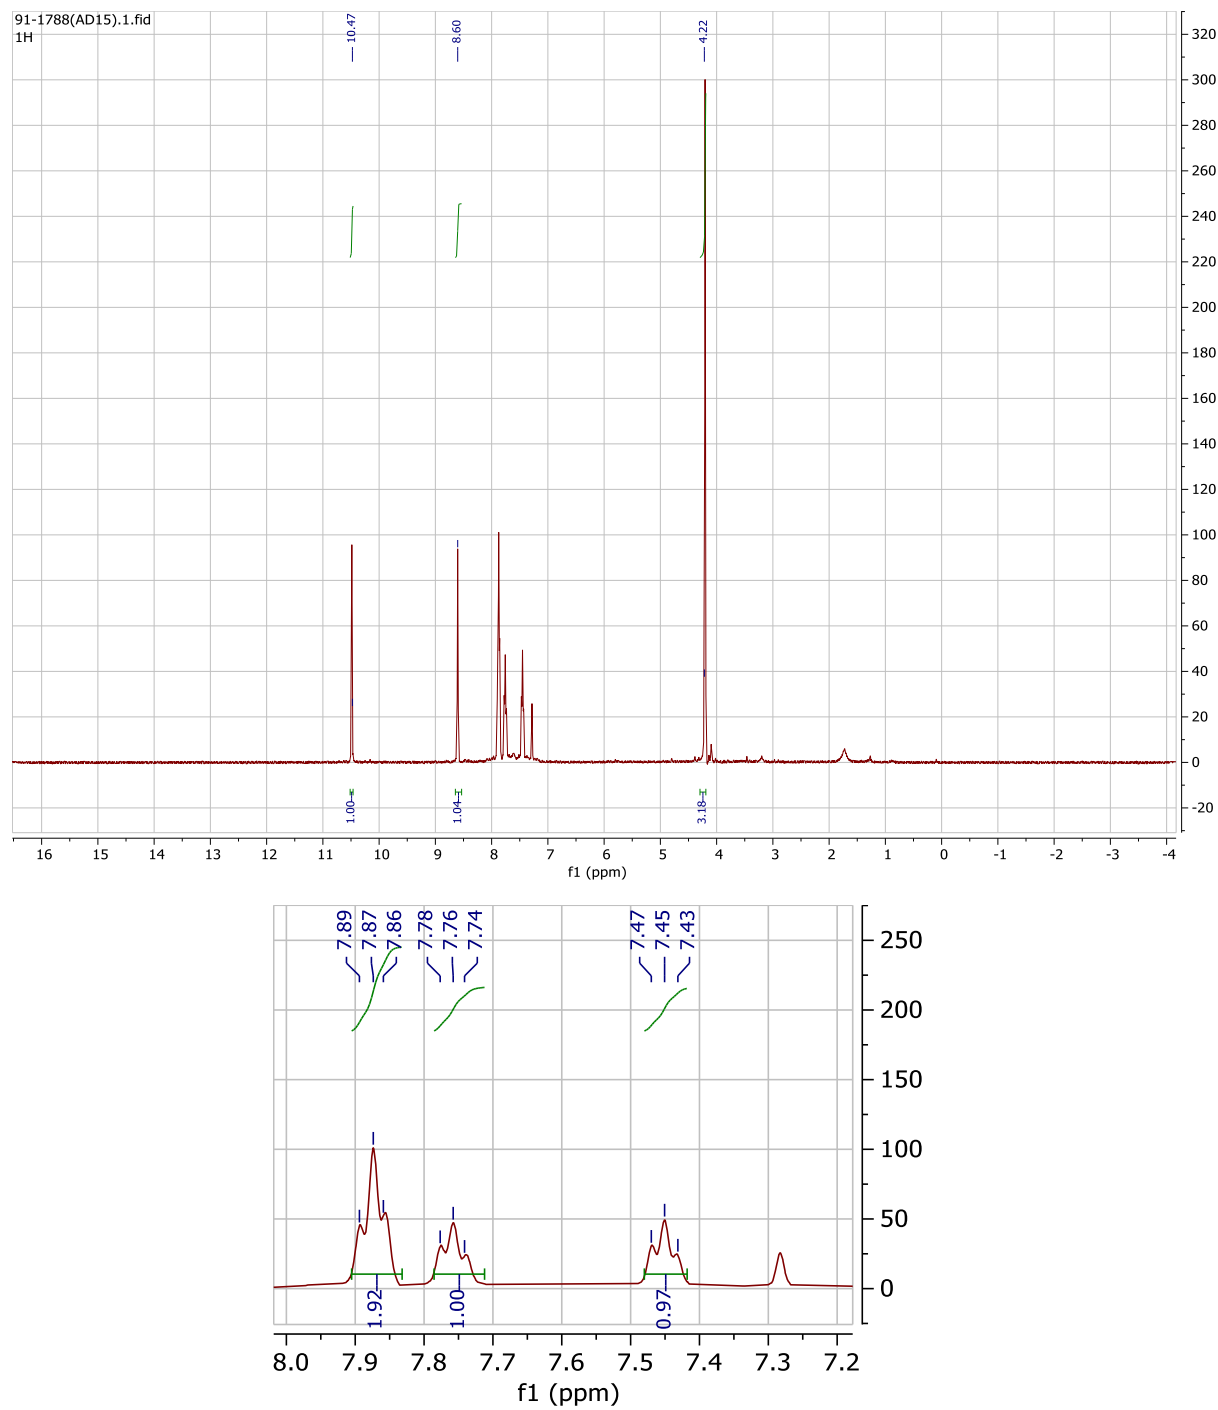

**Figure 4:**  $^{13}\text{C}$ -NMR (100 MHz,  $\text{CDCl}_3$ ) spectrum of 2-methoxyquinoline-3-carbaldehyde (**5**)

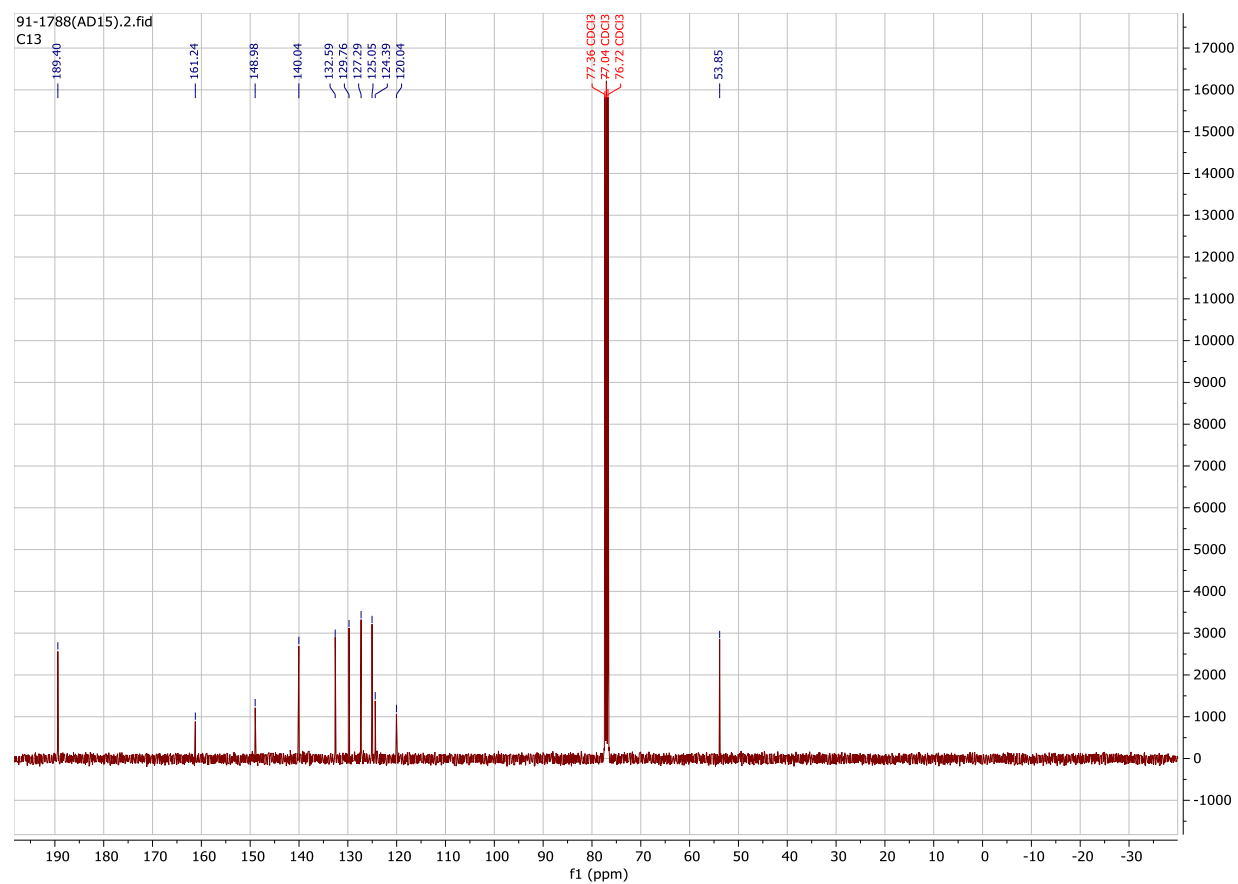

**Figure 5:**  $^1\text{H}$ - NMR (400 MHz,  $\text{CDCl}_3$ ) spectrum of 2-ethoxyquinoline-3-carbaldehyde (6)

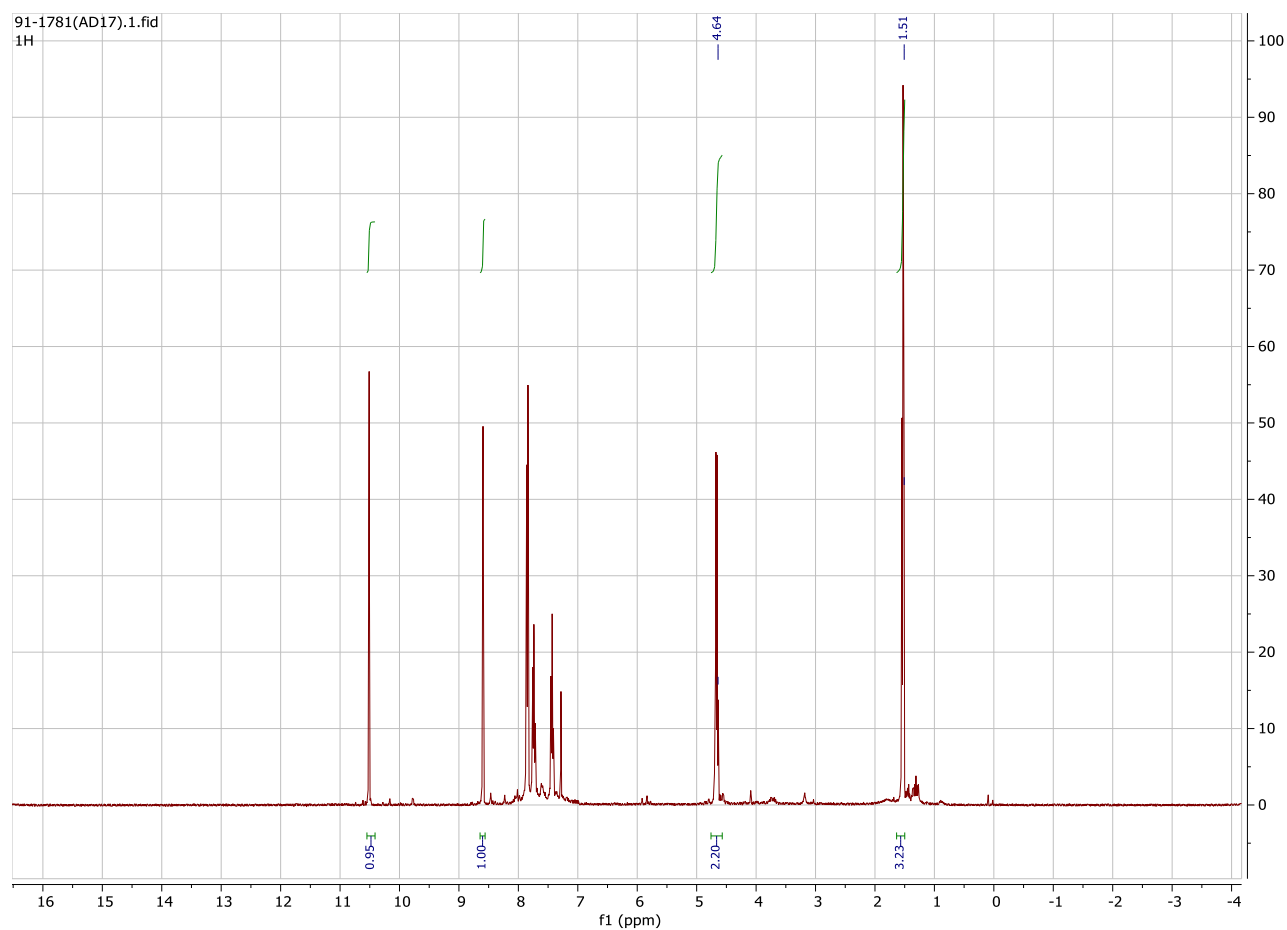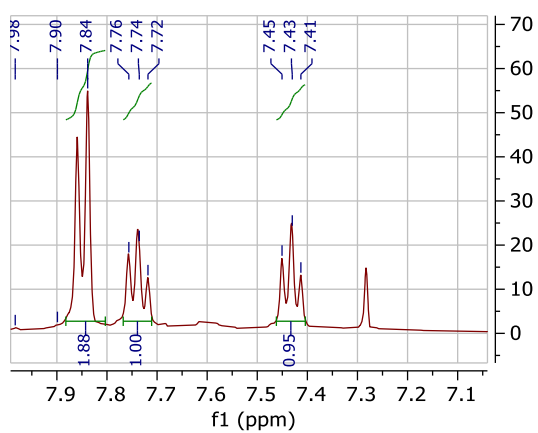

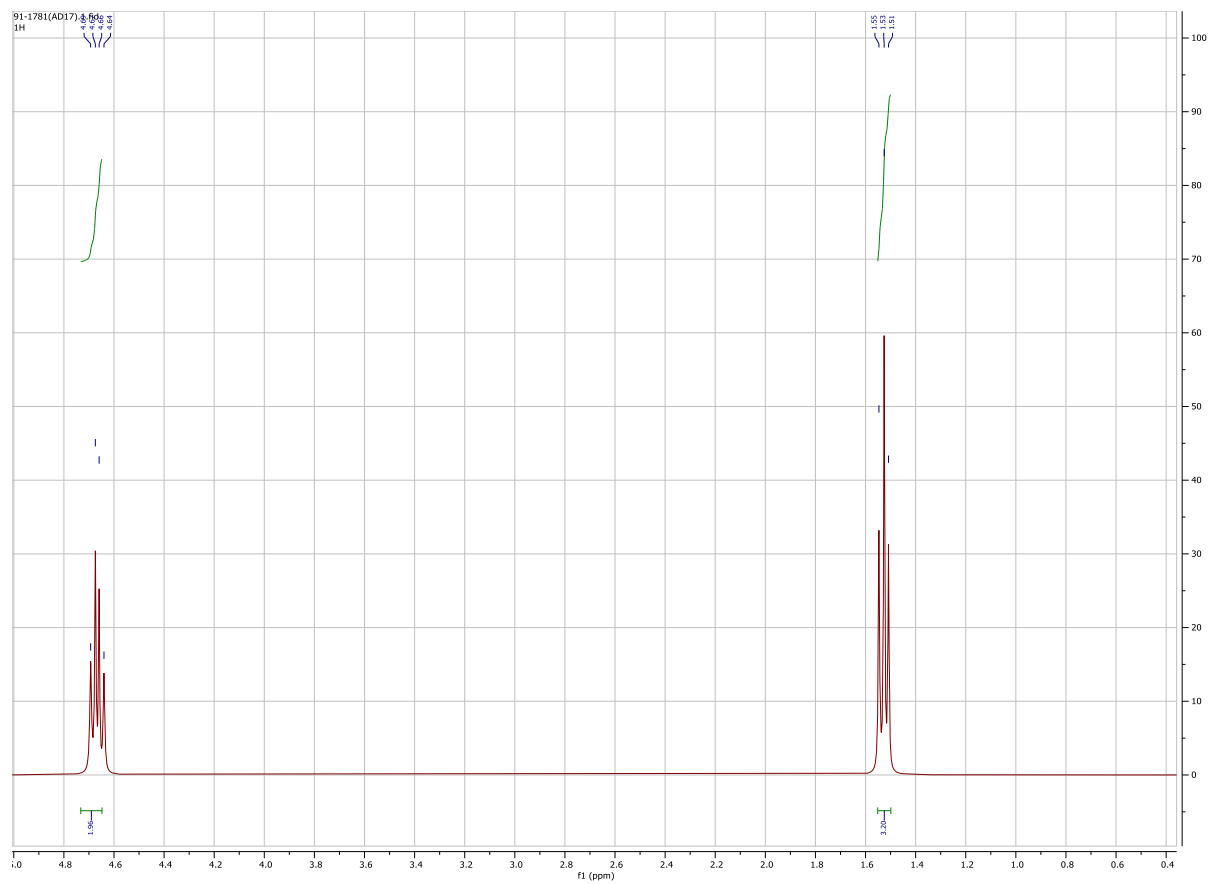

**Figure 6:**  $^{13}\text{C}$ -NMR (100 MHz,  $\text{CDCl}_3$ ) spectrum of 2-ethoxyquinoline-3-carbaldehyde (**6**)

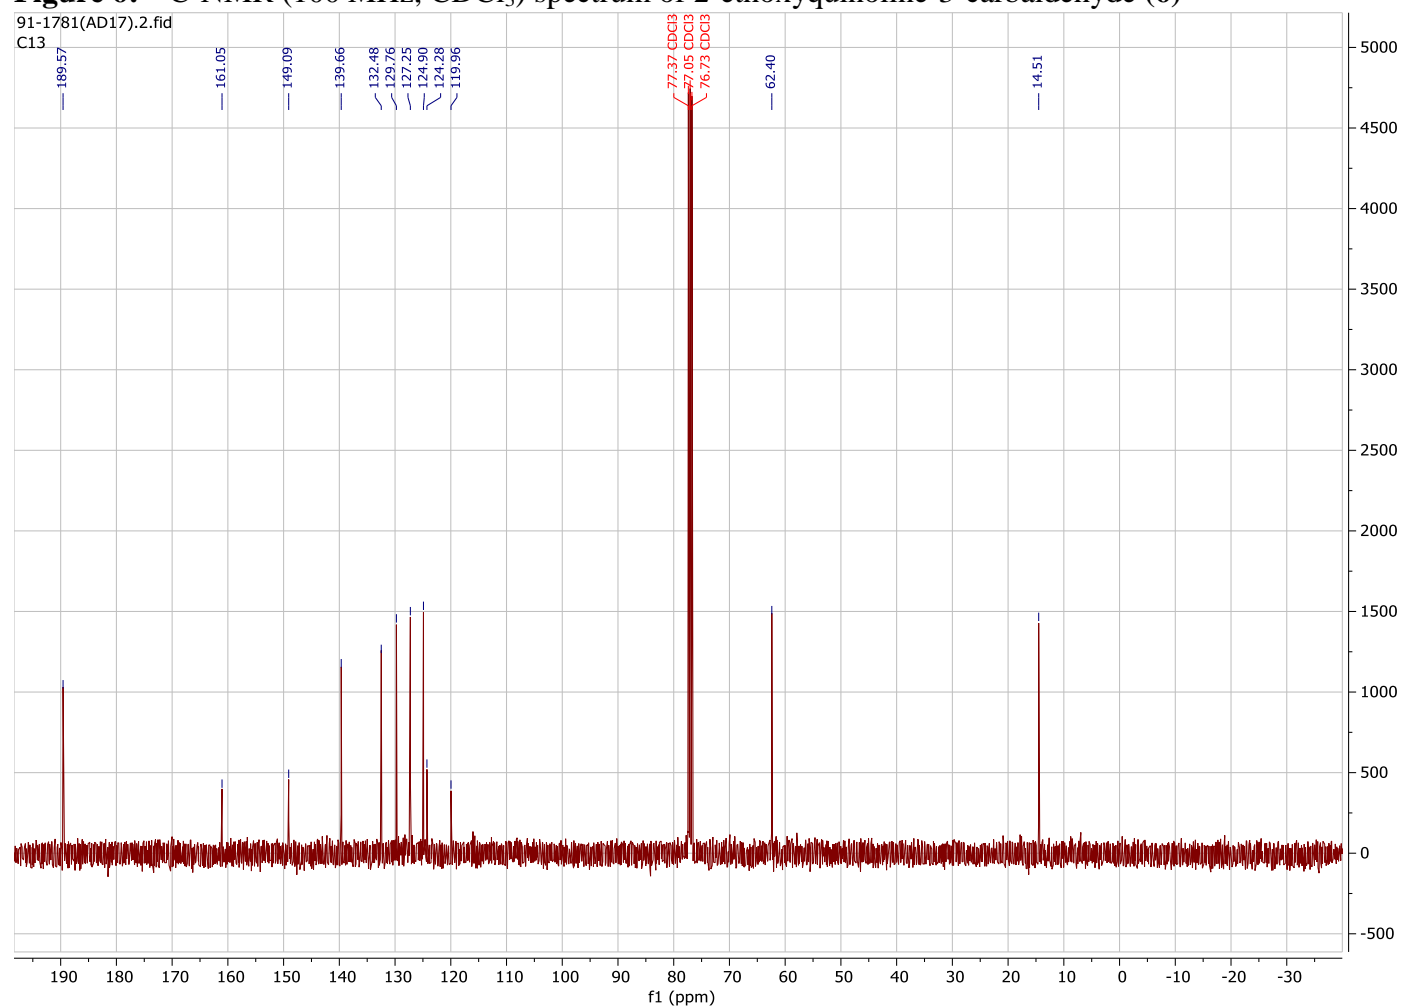

**Figure 7:**  $^1\text{H}$ -NMR (400 MHz, DMSO- $d_6$ ) spectrum of 2-thiocyanatoquinoline-3-carbaldehyde (7)

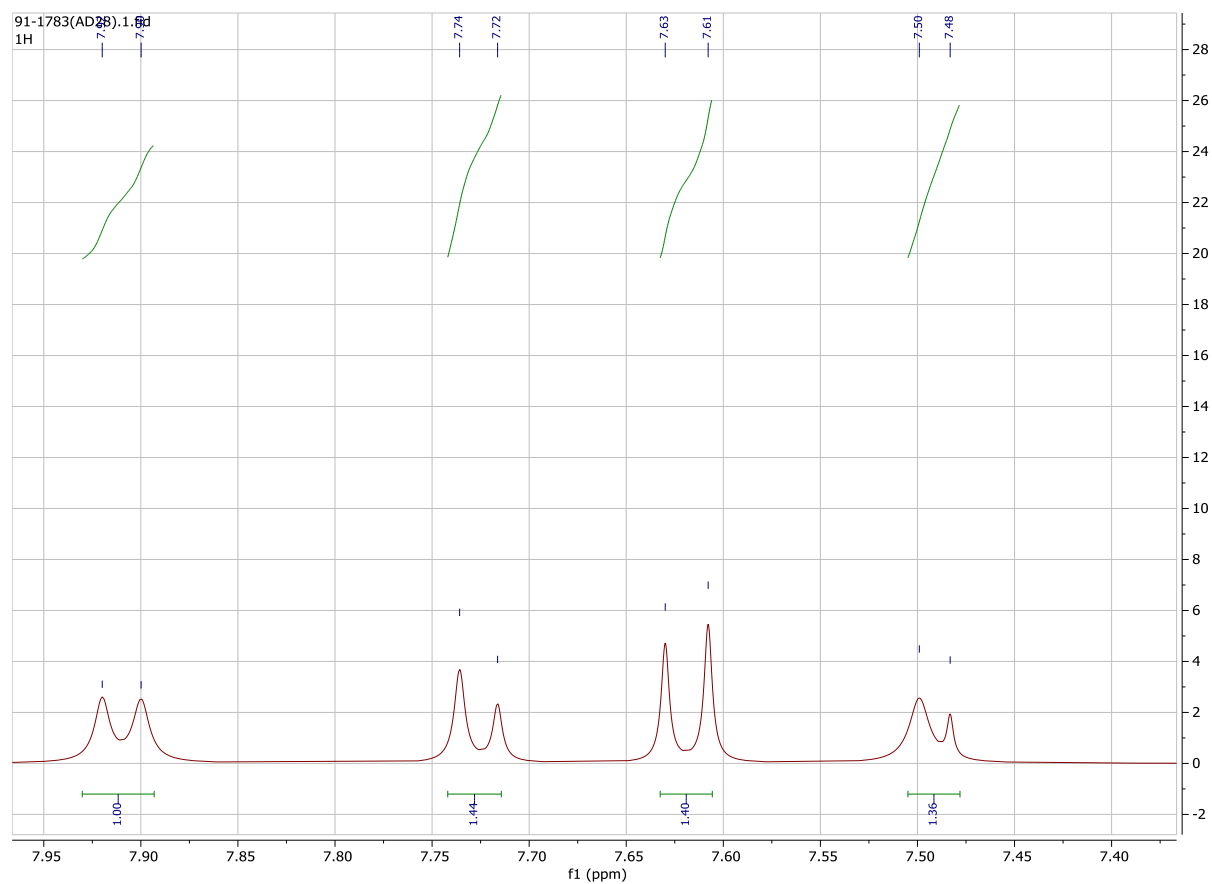

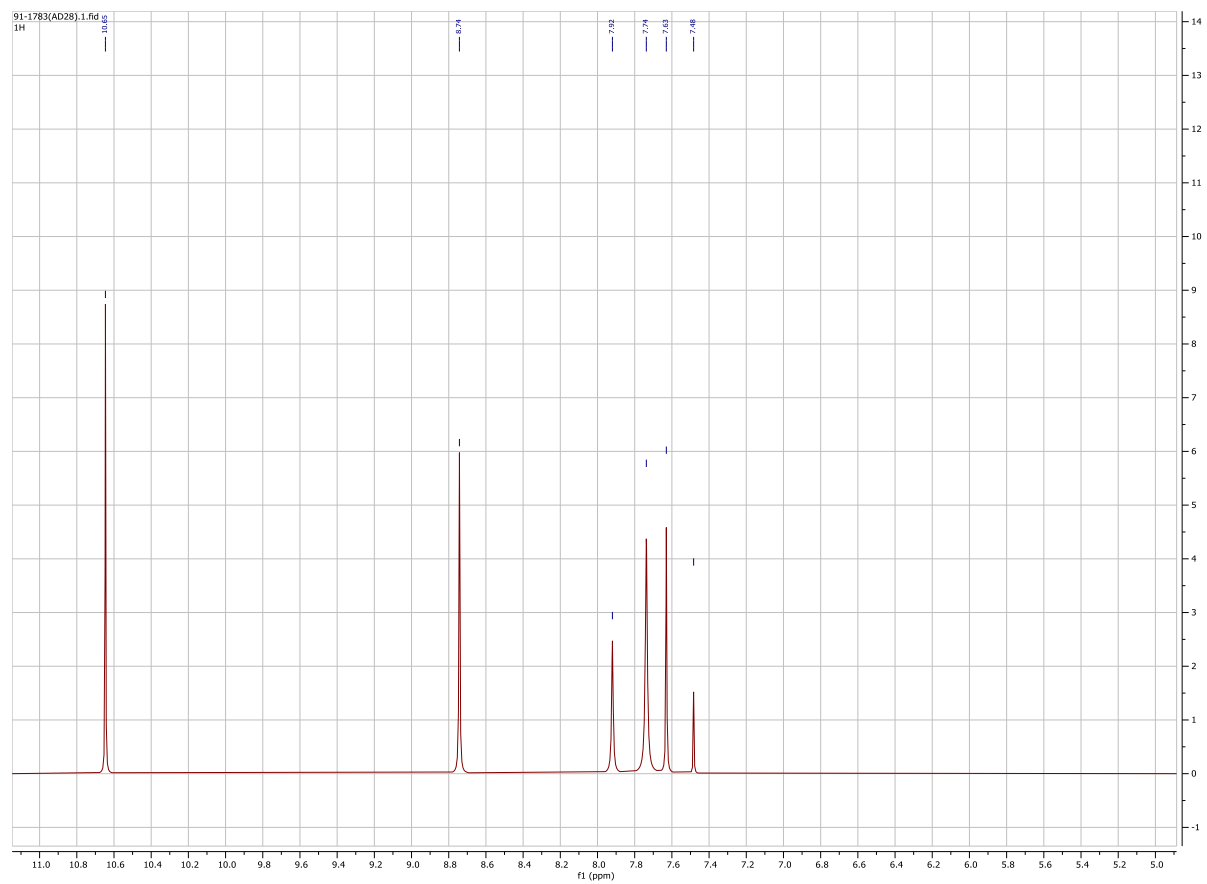

**Figure 8:**  $^1\text{H}$ -NMR (400 MHz, DMSO- $d_6$ ) spectrum of 2-chloroquinoline-3-carboxylic acid (**8**)

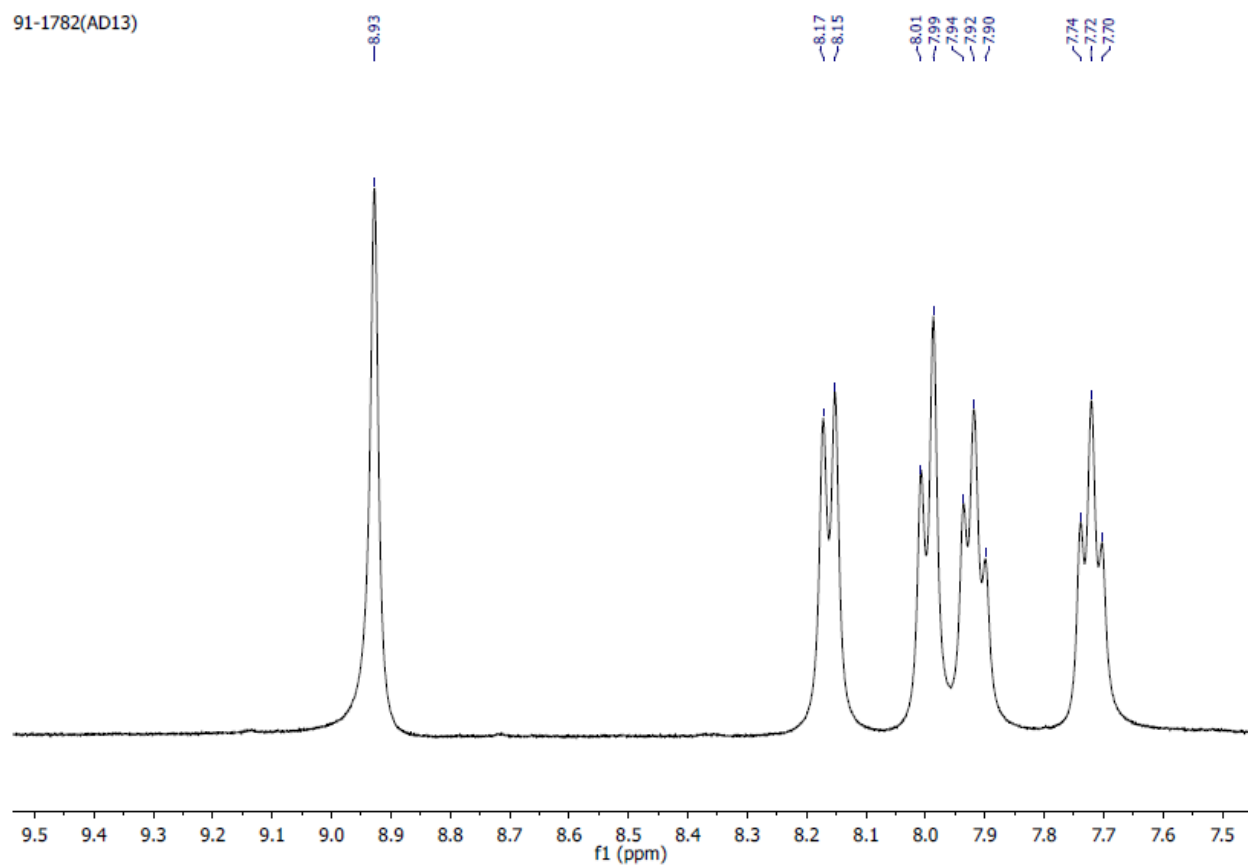

**Figure 9:**  $^{13}\text{C}$ -NMR (100 MHz, DMSO- $d_6$ ) spectrum of 2-ethoxyquinoline-3-carbaldehyde (**8**)

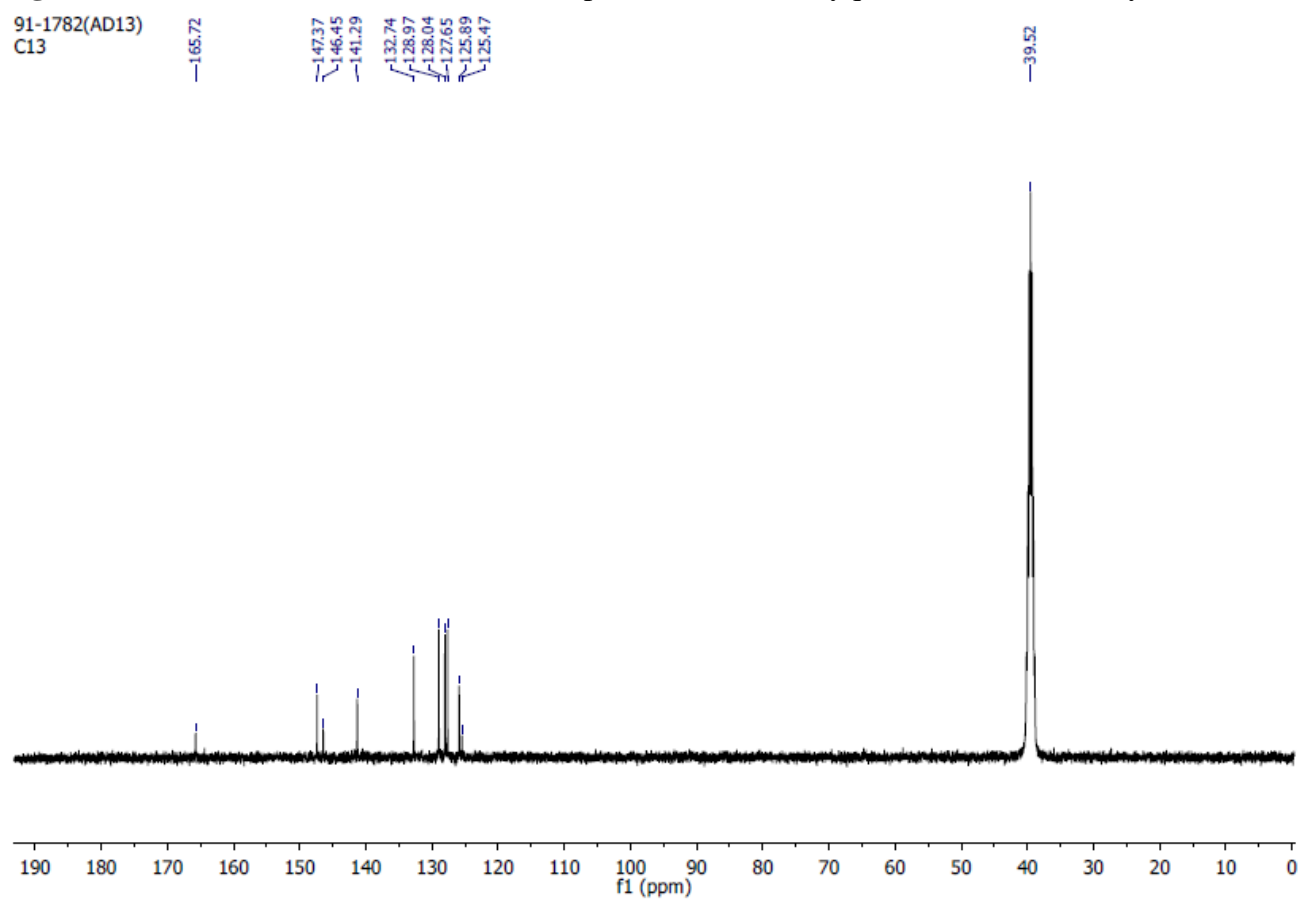

**Figure 10:**  $^1\text{H}$ -NMR (400 MHz,  $\text{CDCl}_3$ ) spectrum of 2-nitro-12H-chromeno[2,3-b]quinolin-12-one (11)

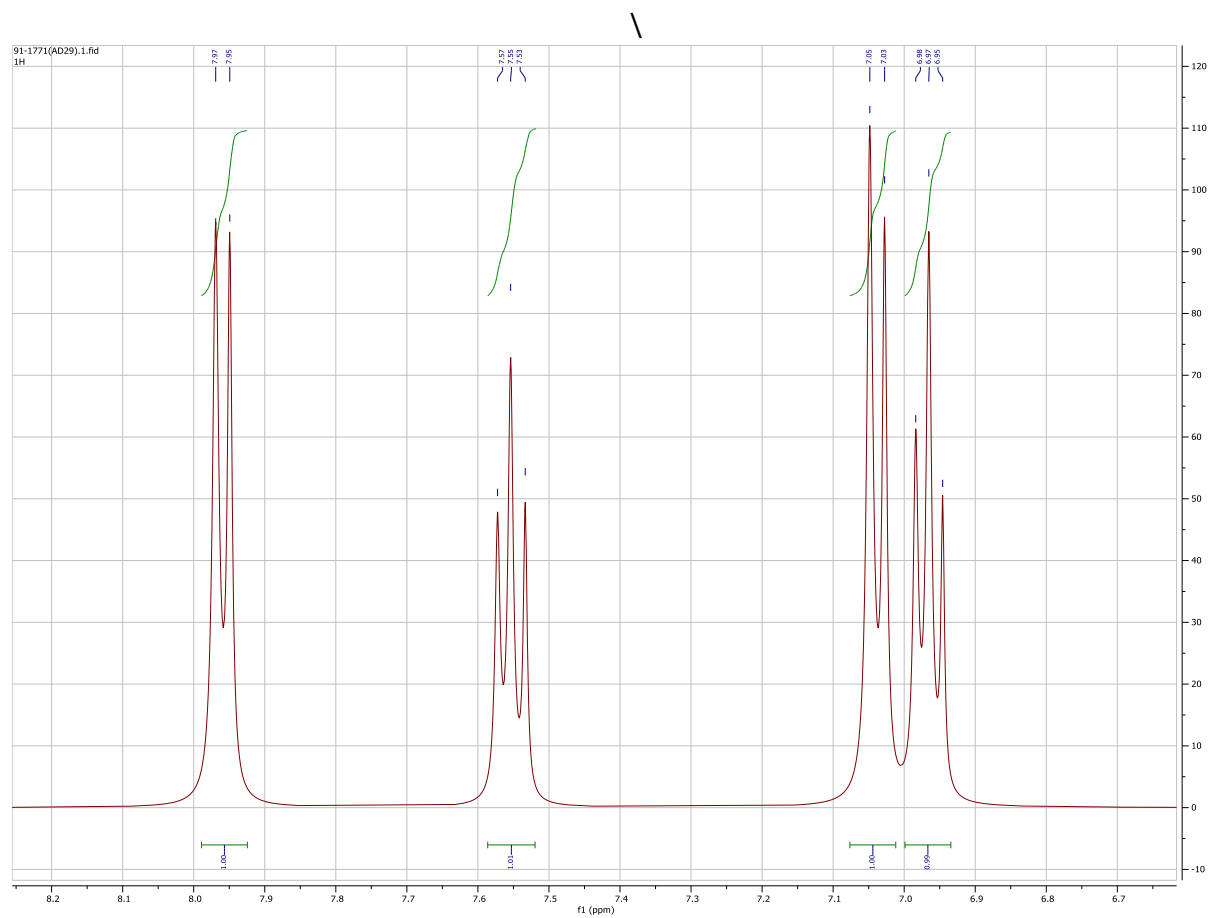

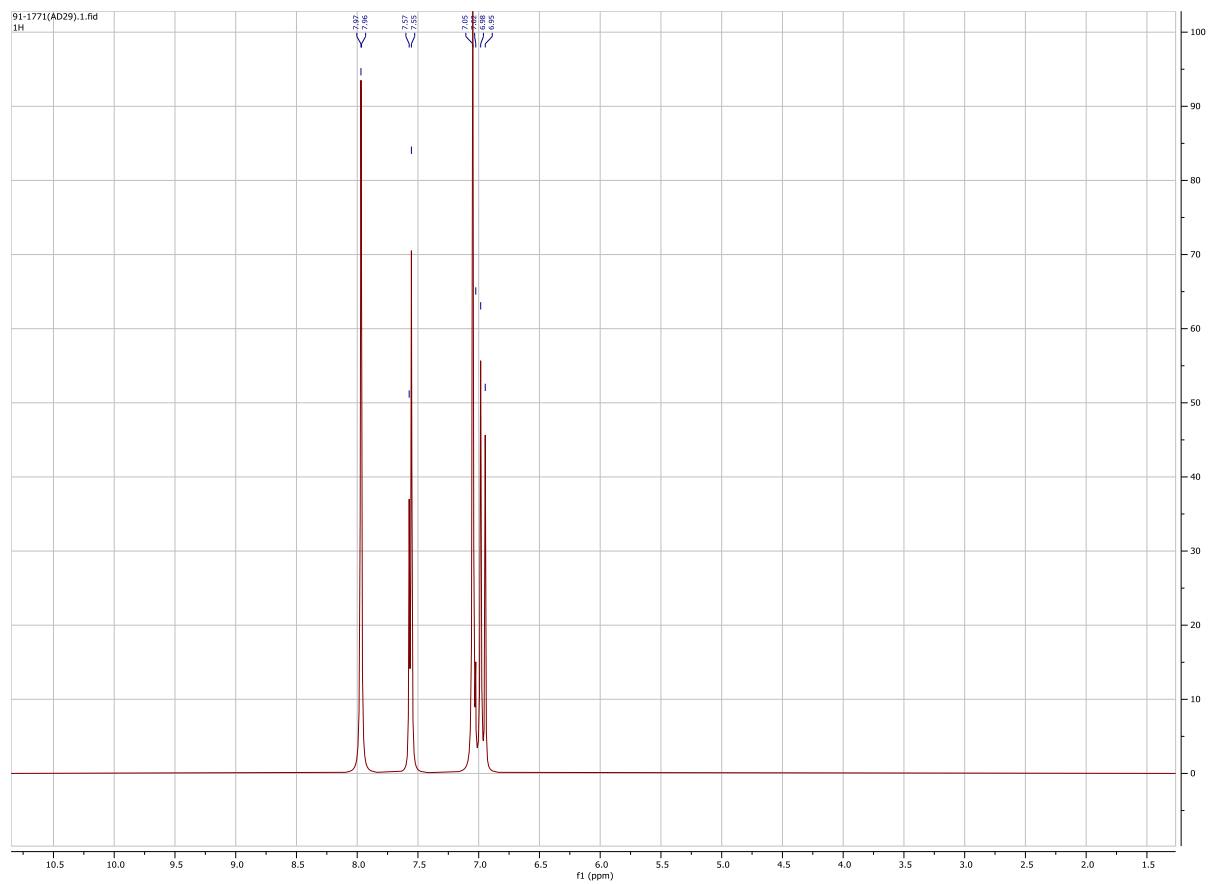

**Figure 11:**  $^{13}\text{C}$ -NMR (100 MHz,  $\text{CDCl}_3$ ) spectrum of 2-nitro-12H-chromeno[2,3-b]quinolin-12-one (**11**)

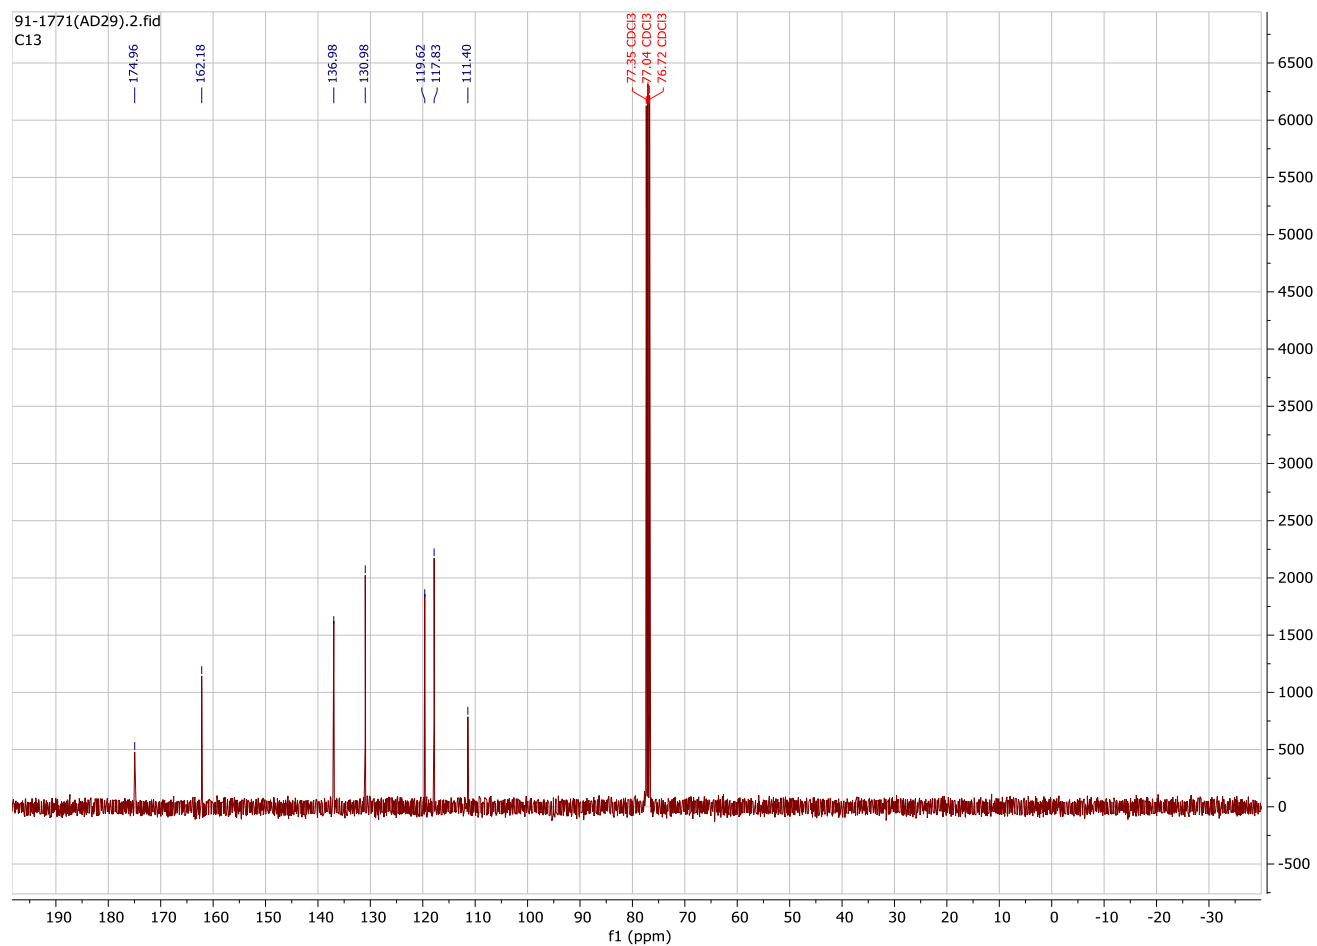

**Figure 12:**  $^1\text{H}$ -NMR (400 MHz;  $\text{CDCl}_3$ ) spectrum of 2-chloro-8-methylquinoline-3-carbaldehyde (**14**)

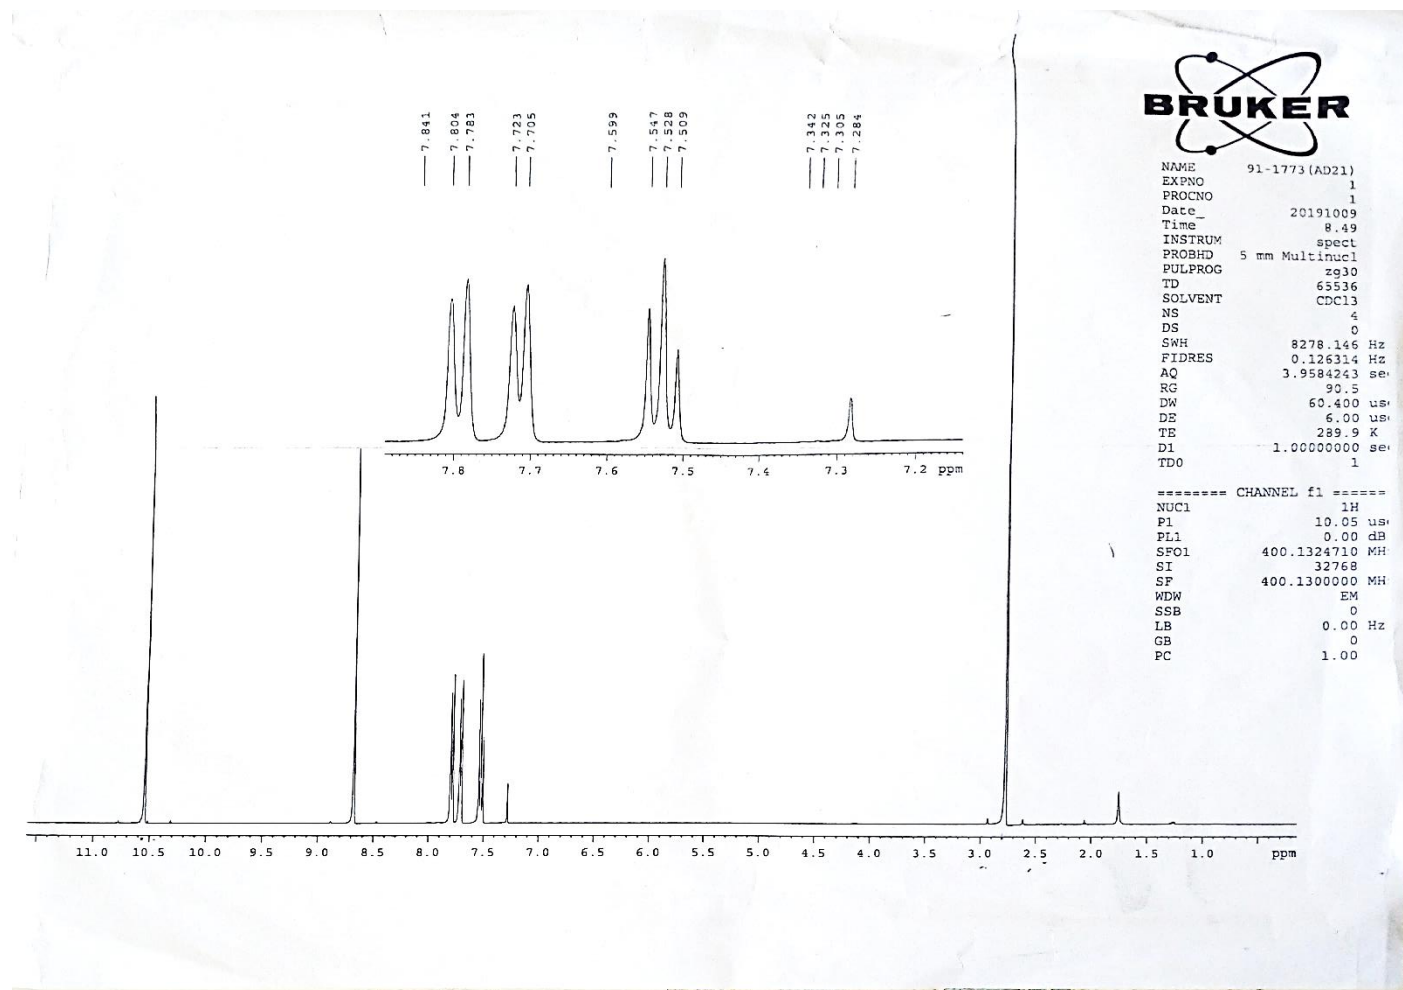

**Figure 13:**  $^{13}\text{C}$ -NMR (100 MHz;  $\text{CDCl}_3$ ) spectrum of 2-chloro-8-methylquinoline-3-carbaldehyde (**14**)

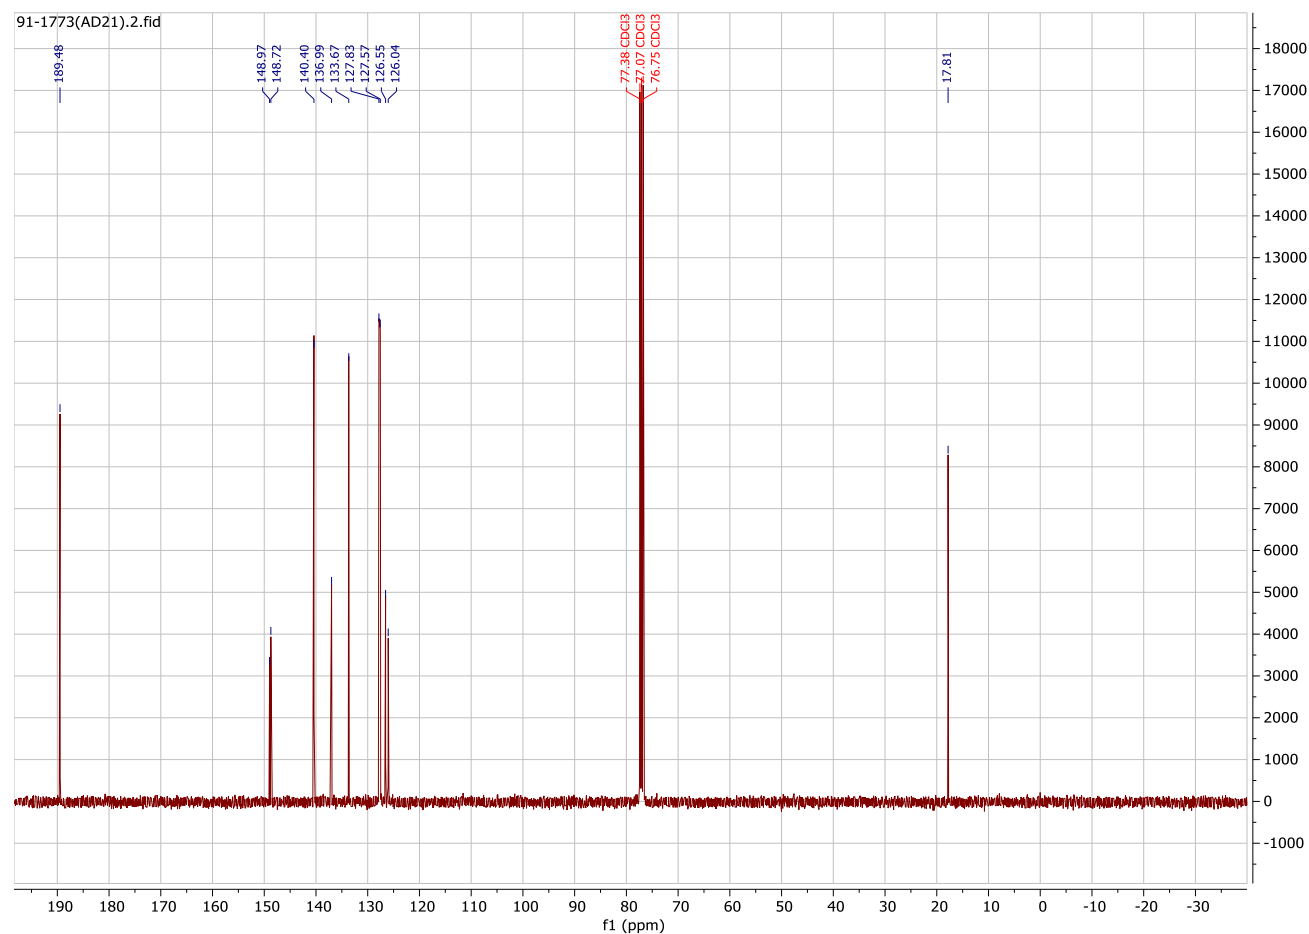

**Figure 14:**  $^1\text{H}$ - NMR (400 MHz;  $\text{CDCl}_3$ ) spectrum of 8-methyl-2-oxoquinoline-3-carbaldehyde (15)

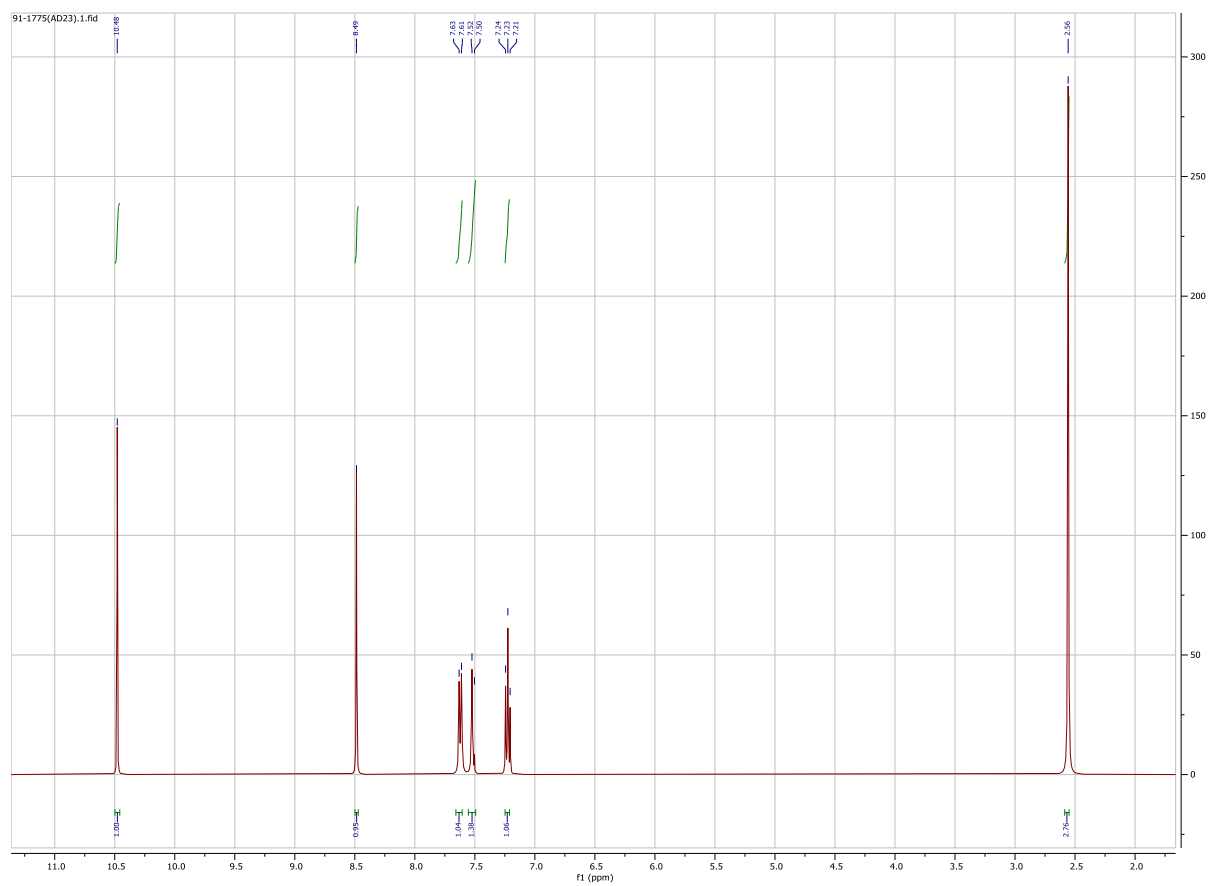

**Figure 15:**  $^{13}\text{C}$ -NMR (100 MHz;  $\text{CDCl}_3$ ) spectrum of 8-methyl-2-oxoquinoline-3-carbaldehyde (15)

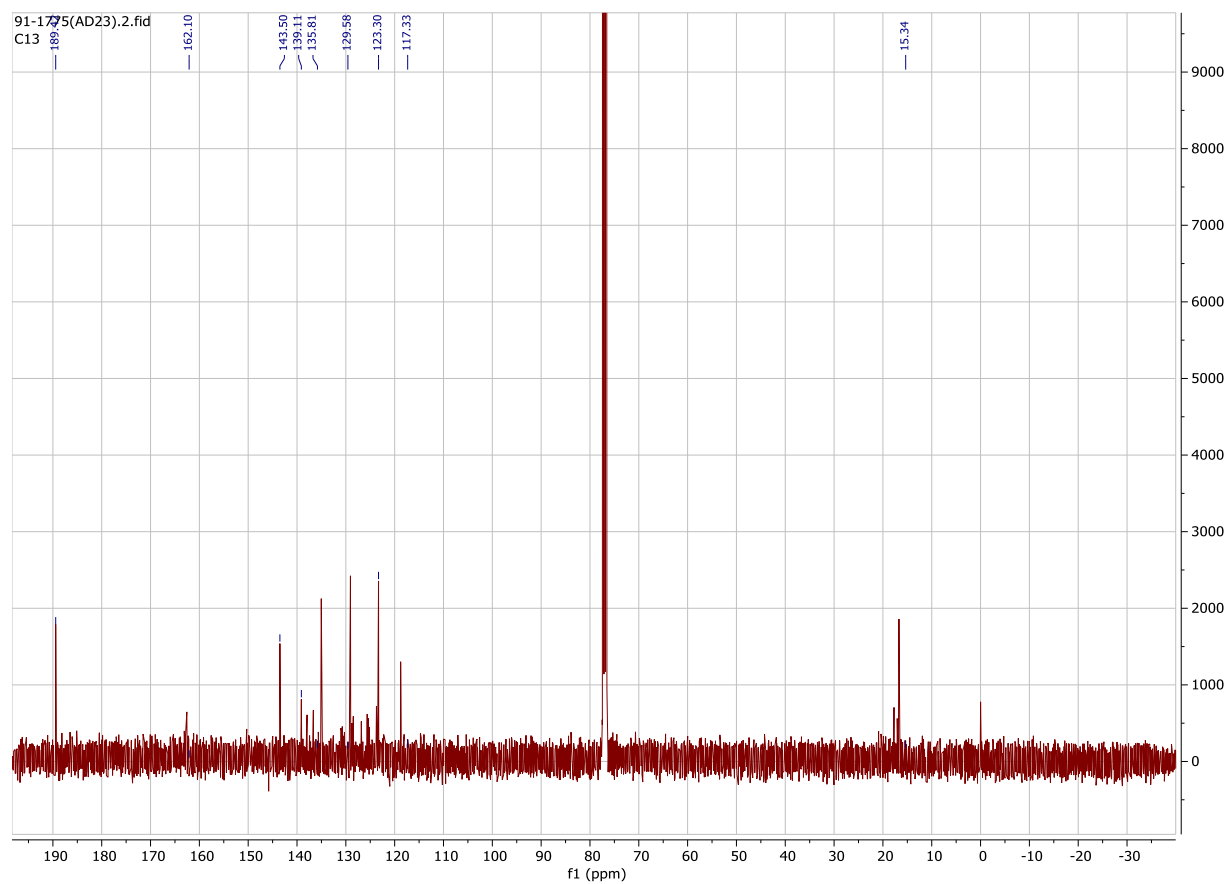

**Figure 16:**  $^1\text{H}$ - NMR spectrum (400 MHz;  $\text{CDCl}_3$ ) of (2-methoxy-8-methylquinolin-3-yl)methanol (**16**)

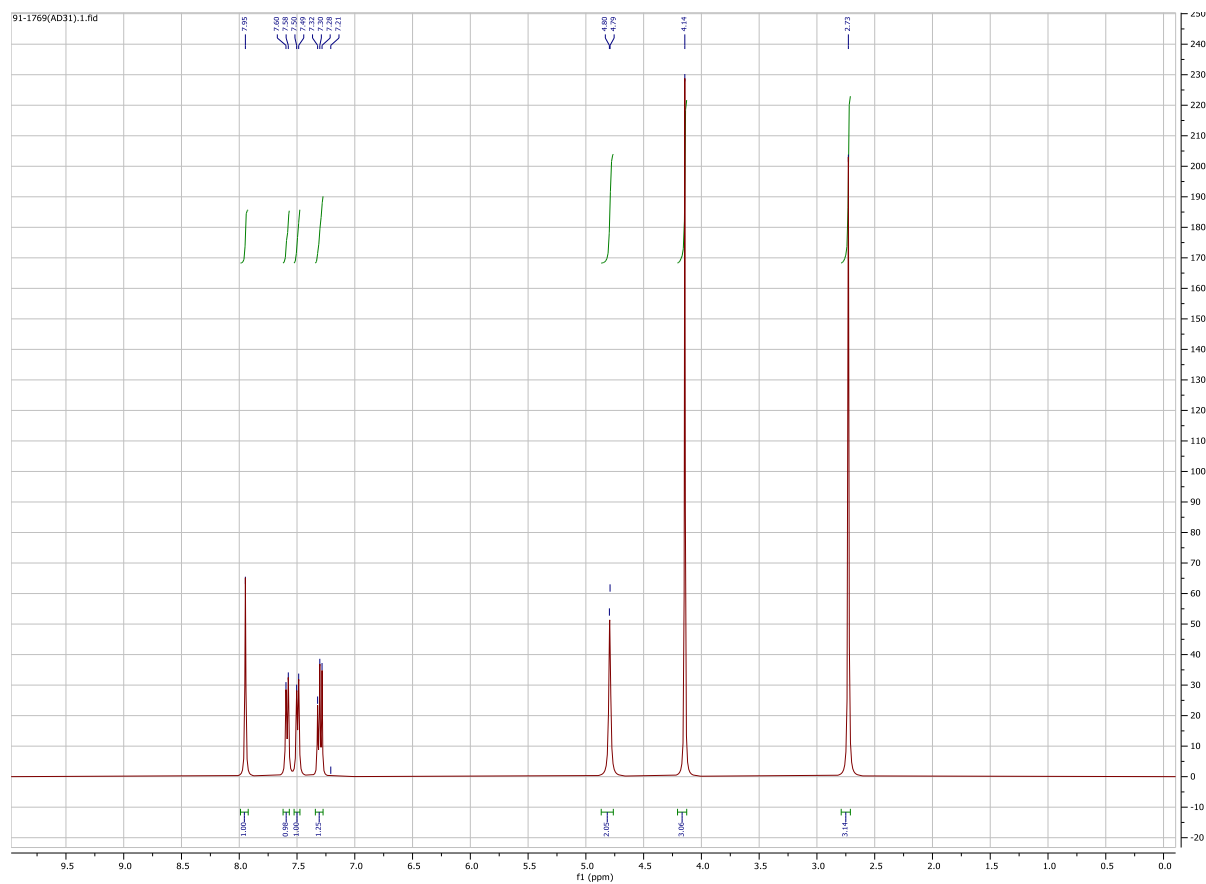

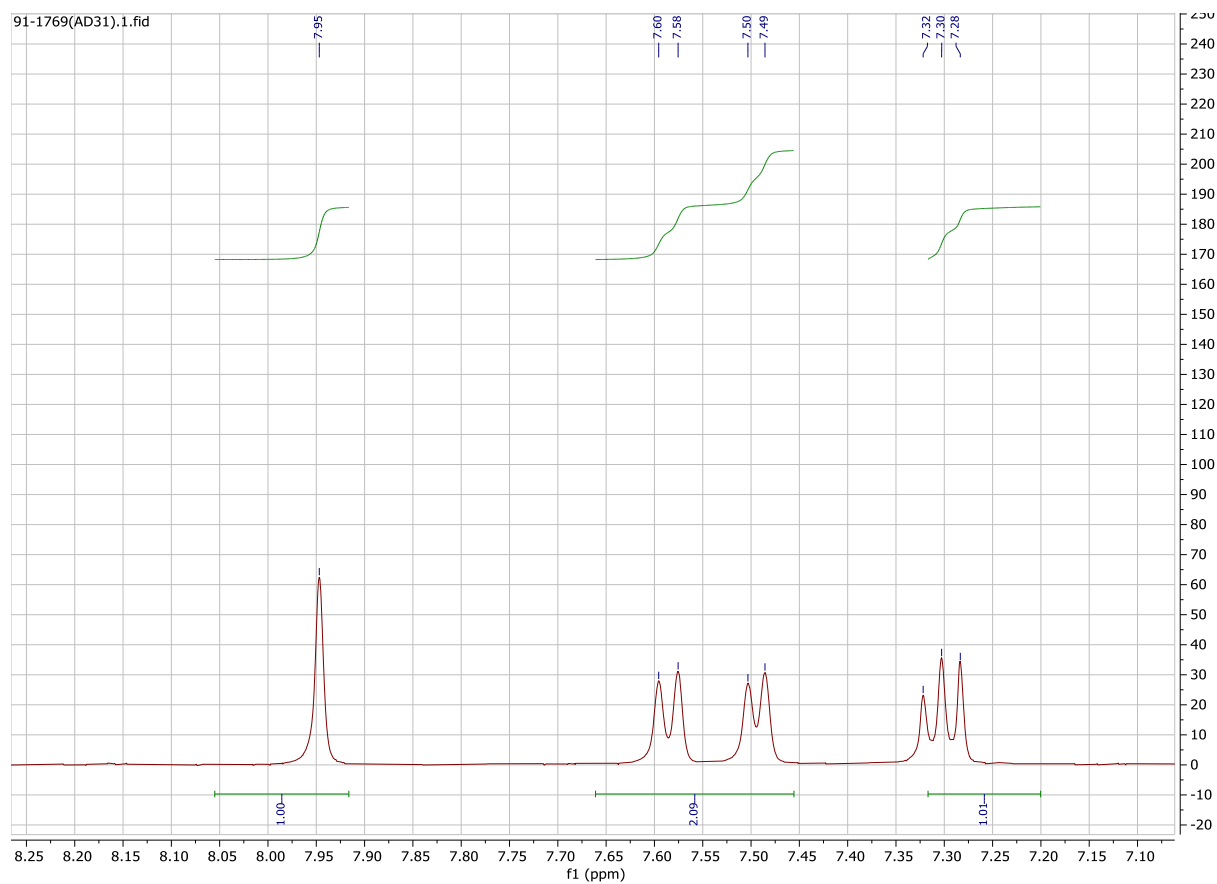

**Figure 17:**  $^{13}\text{C}$ -NMR spectrum (100 MHz;  $\text{CDCl}_3$ ) of (2-methoxy-8-methylquinolin-3-yl)methanol (**16**)

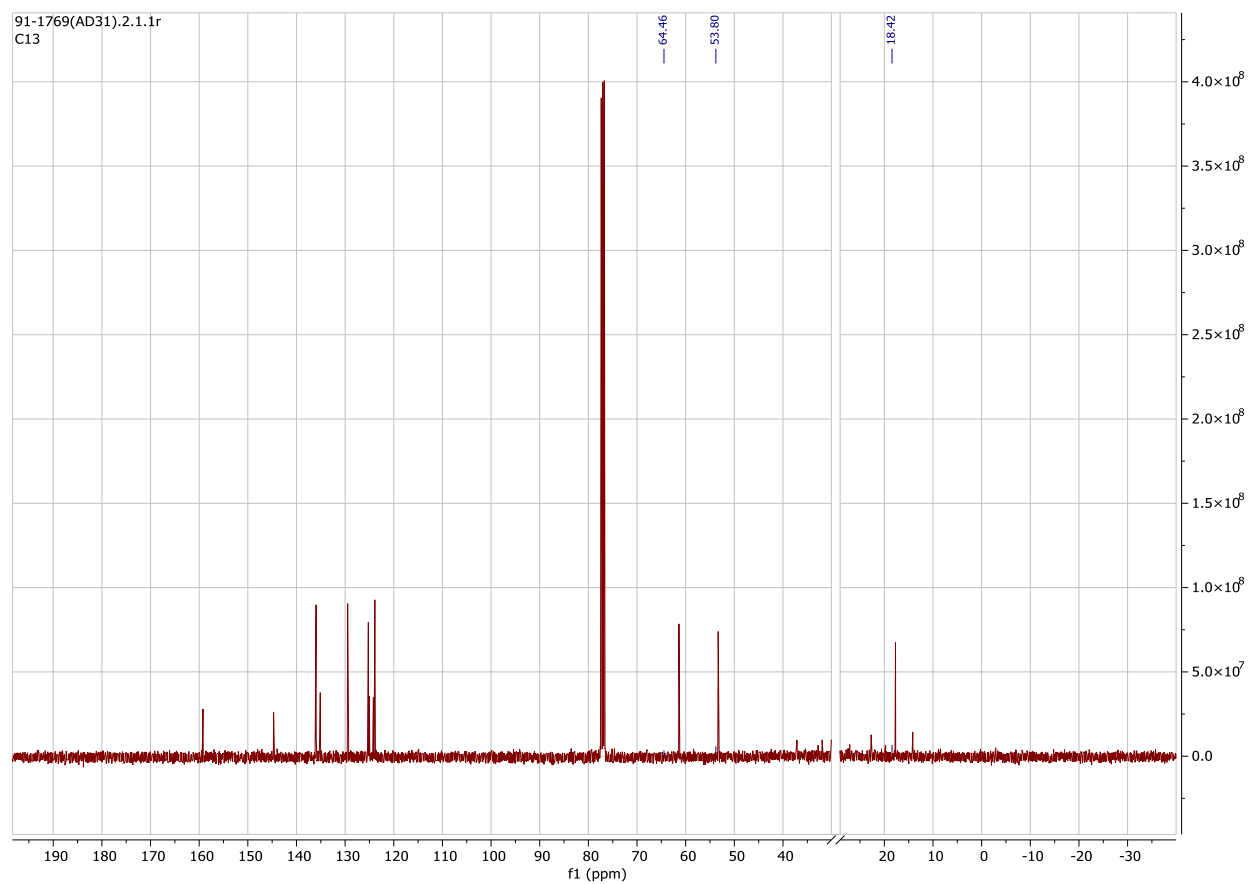

**Figure 18:**  $^1\text{H}$ -NMR (400 MHz;  $\text{CDCl}_3$ ) spectrum of (2-ethoxy-8-methylquinolin-3-yl)methanol (17)

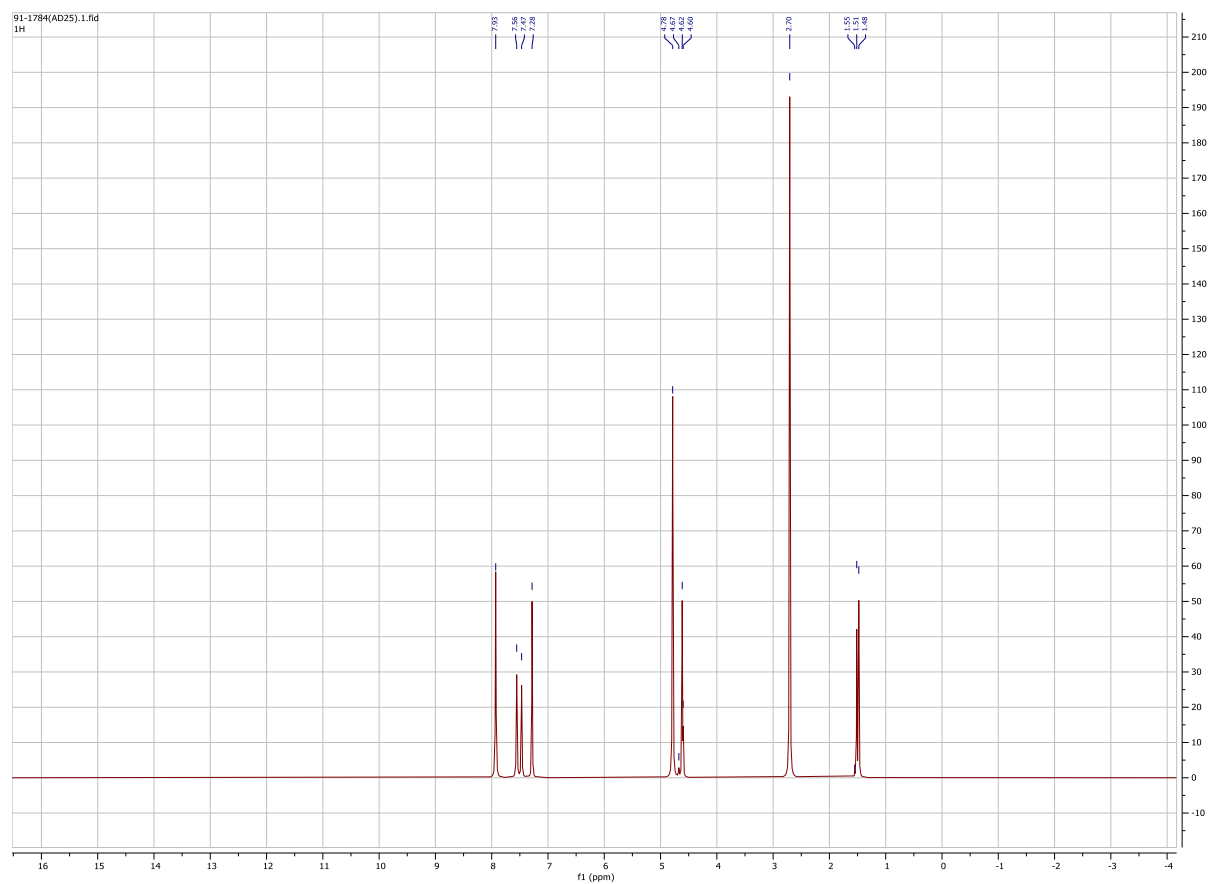

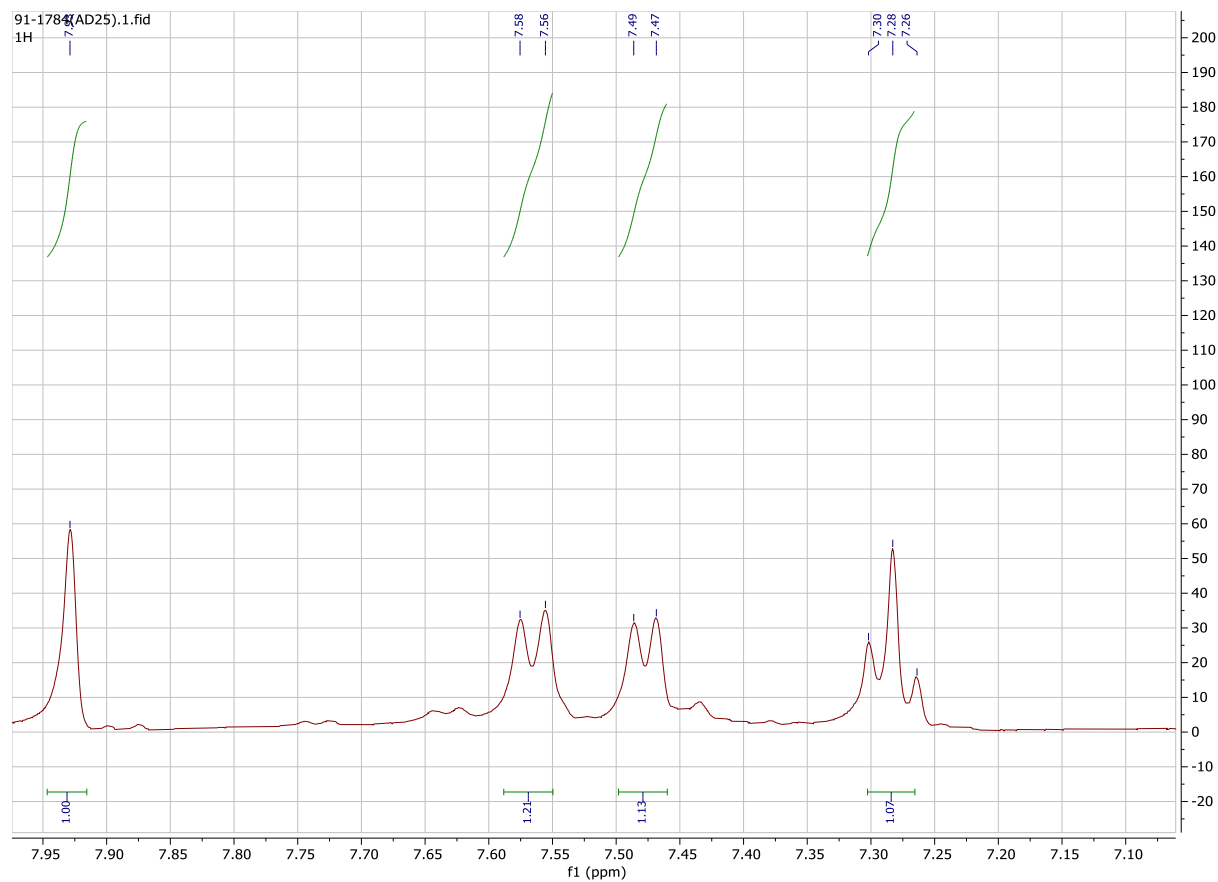

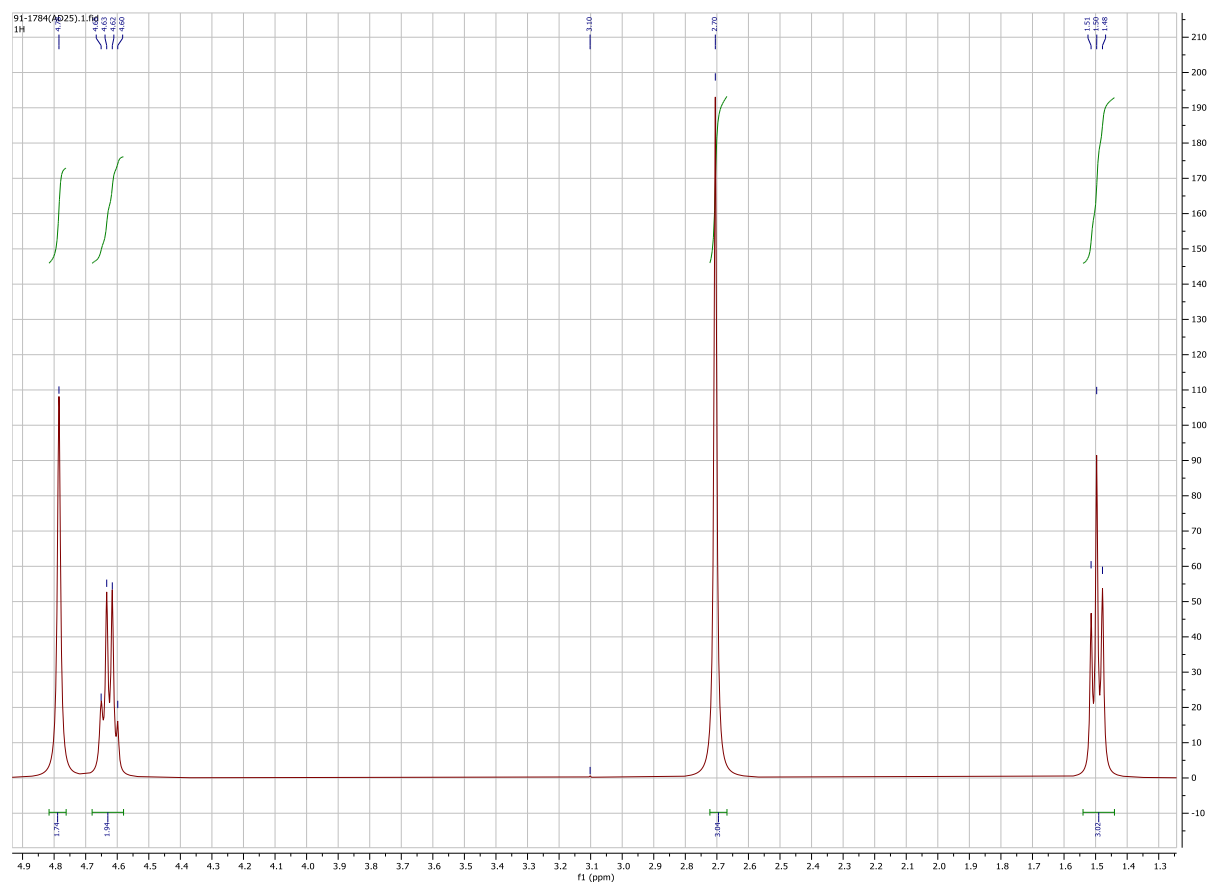

**Figure 19:**  $^{13}\text{C}$ -NMR (100 MHz;  $\text{CDCl}_3$ ) spectrum of (2-ethoxy-8-methylquinolin-3-yl)methanol (17)

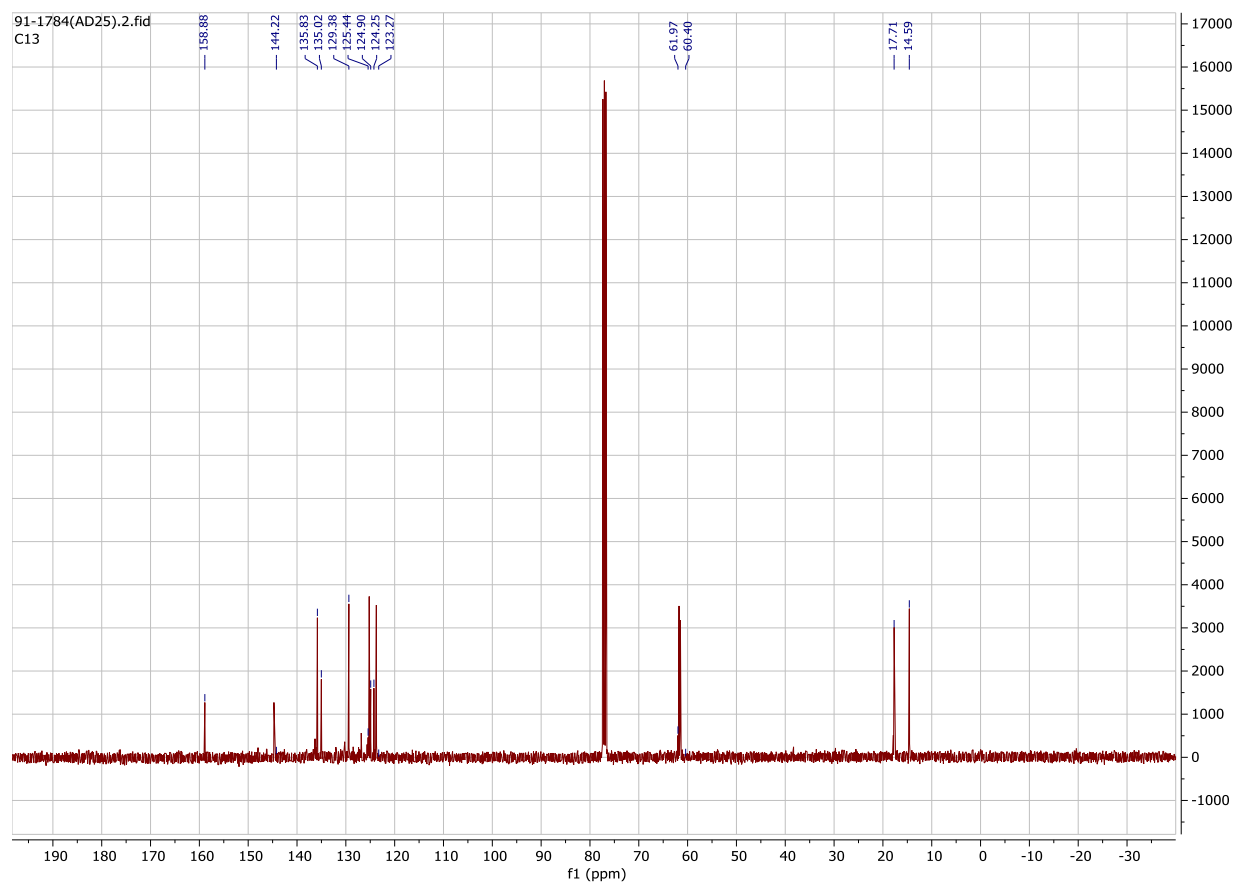

Supplement: f1 [file 1324096.f1.zip › 1324096.f1/Supplementary Information_NMR Spectra_Final.pdf]
