# Supplementary material for: Synthesis and Antibacterial, Antioxidant, and Molecular Docking Analysis of Some Novel Quinoline Derivatives
Source: Hindawi journal article supplement (doi:10.1155/2020/1324096), 2020-07-24
Supplement: f1 [file 1324096.f1.zip]

Archive with 2 entries (2 files):
- 1324096.f1/Supplementary Information_Molecular Docking_Final.pdf
- 1324096.f1/Supplementary Information_NMR Spectra_Final.pdf
