# Supplementary material for: Synthesis and Antibacterial, Antioxidant, and Molecular Docking Analysis of Some Novel Quinoline Derivatives
Source: Hindawi journal article supplement (doi:10.1155/2020/1324096), 2020-07-24
Supplement: f1 [file 1324096.f1.zip › 1324096.f1/Supplementary Information_Molecular Docking_Final.pdf]

Supplementary information on molecular docking analysis of the synthesized compounds

Table 1. Molecular docking value of **4-17** against *S. aureus* DNA gyraseB

| Compounds            | Affinity<br>(kcal/mol) | H-bond                     | Receptor interactions                                                     |
|----------------------|------------------------|----------------------------|---------------------------------------------------------------------------|
| <b>4</b>             | -4.8                   | Ser-438, Asp-437           | Arg-1122, Glu-435, Phe-1123, Gly-436, Asp-508                             |
| <b>5</b>             | -5.1                   | Arg-1122, Ser-438          | Glu-435, Phe-1123, Asp-508, Asp-512, Lys-460, Ile-516, Gly-459            |
| <b>6</b>             | -5.2                   | Arg-1122, Ser-438          | Glu-435, Phe-1123, Asp-512, Lys-460, Ile-516                              |
| <b>7</b>             | -5.4                   | Arg-1122, Ser-438          | Glu-435, Phe-1123, Asp-512, Asp-437, Gly-459, Gly-436, Lys-460            |
| <b>8</b>             | -5.4                   | Arg-1122                   | Glu-435, Phe-1123, Asp-508, Asp-510, Gly-459                              |
| <b>11</b>            | -6.7                   | Arg-1122, Ser-438, Gly-459 | Arg-458, Asp-437, Glu-435, Asp-508, Phe-1123, Gly-436, Leu-457            |
| <b>14</b>            | -5.2                   | Ser-438                    | Arg-1122, Glu-435, Phe-1123, Gly-436, Asp-437, Asp-508                    |
| <b>15</b>            | -5.3                   | Arg-1122, Ser-438          | Glu-435, Phe-1123, Gly-459, Ile-516, Lys-460, Asp-512, His-1081           |
| <b>16</b>            | -5.2                   | Arg-1122, Ser-438          | Glu-435, Phe-1123, Asp-512, Lys-460, Ile-516, Gly-459                     |
| <b>17</b>            | -5.4                   | Arg-1122, Ser-438          | Glu-435, Phe-1123, Asp-508, His-1081, Asp-512, Lys-460, Ile-516, Gly-459  |
| <b>Ciprofloxacin</b> | -6.5                   | Arg-1122, Ser-438          | Glu-435, Asp-512, Arg-1033, His-1081, Asp-508, Phe-1123, Gly-436, Ala-439 |

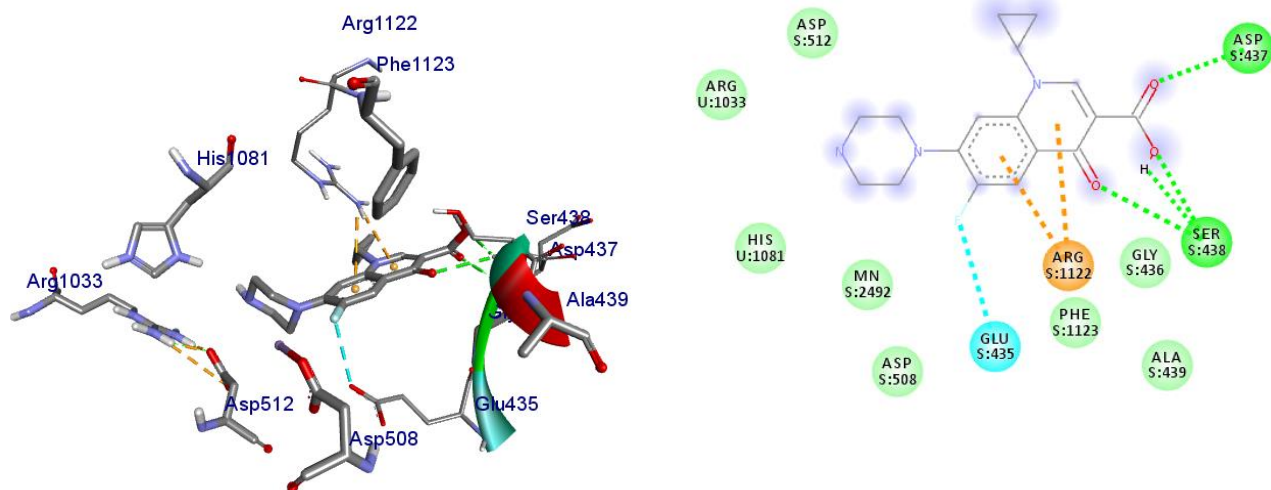

Fig 1. The binding interactions of Ciprofloxacin against *S. aureus* DNA gyrase (PDB ID: 2XCT).

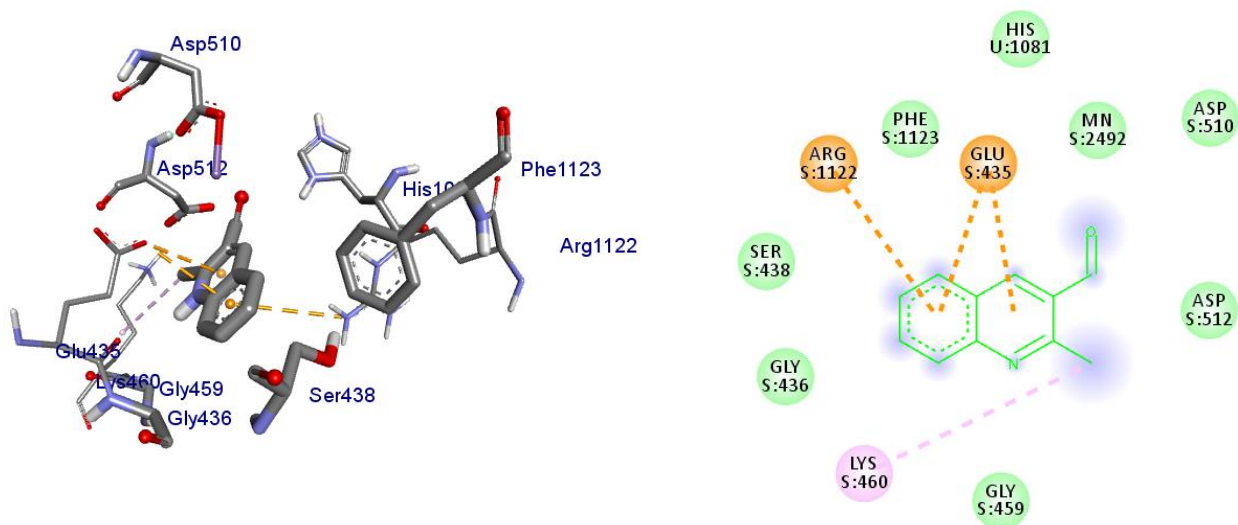

Fig 2. The binding interactions of compound **4** against *S. aureus* DNA gyrase (PDB ID: 2XCT).

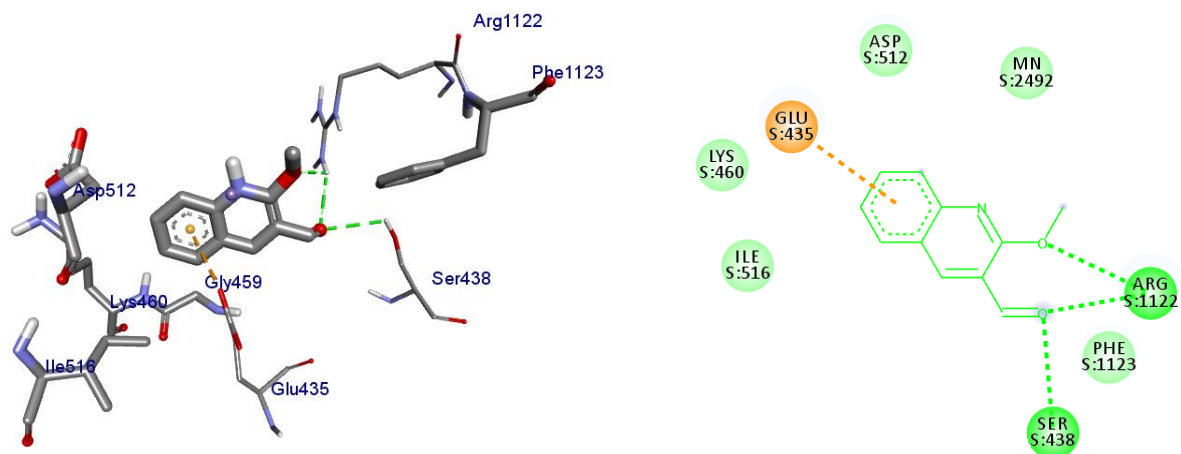

Fig 3. The binding interactions of compound 5 against *S. aureus* DNA gyrase (PDB ID: 2XCT).

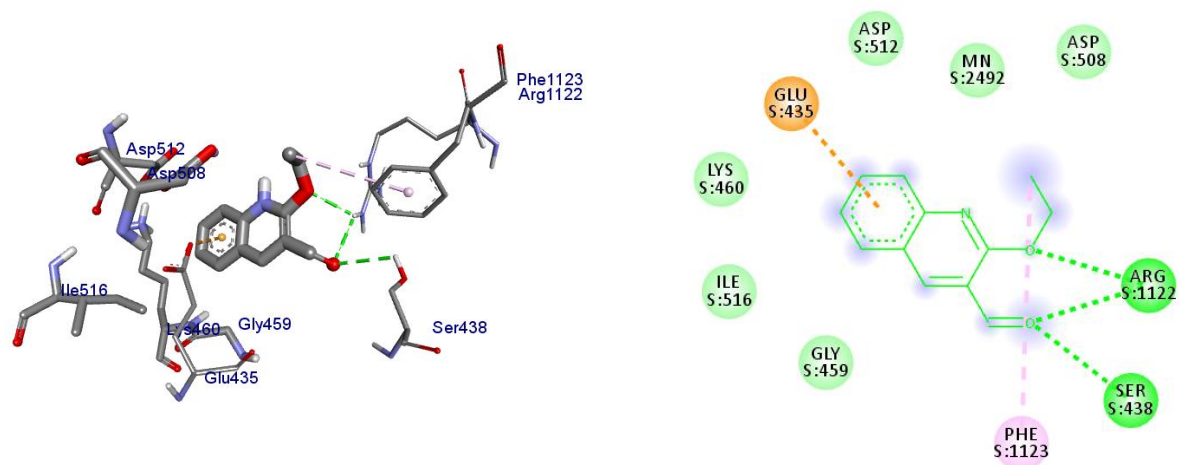

Fig 4. The binding interactions of compound 6 against *S. aureus* DNA gyrase (PDB ID: 2XCT).

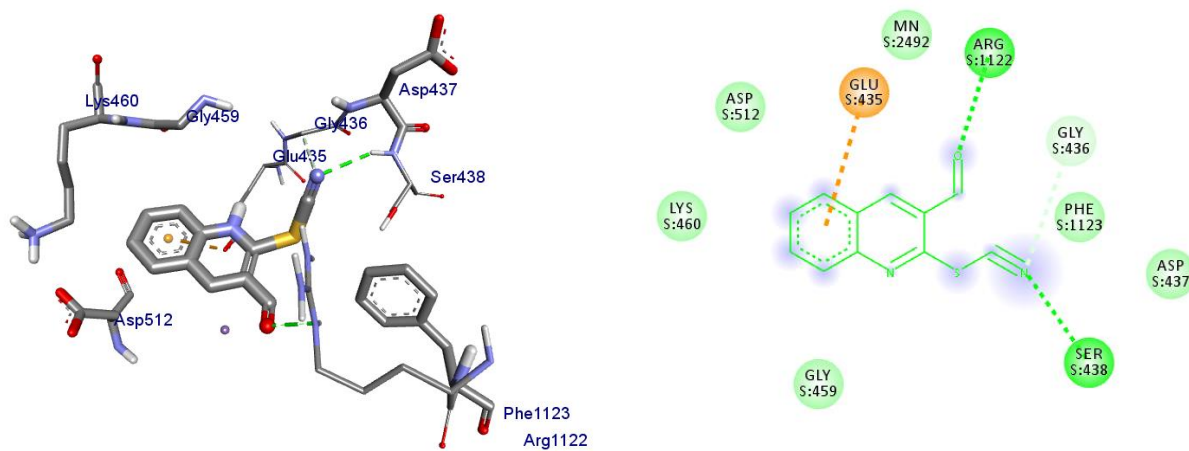

Fig 5. The binding interactions of compound **7** against *S. aureus* DNA gyrase (PDB ID: 2XCT).

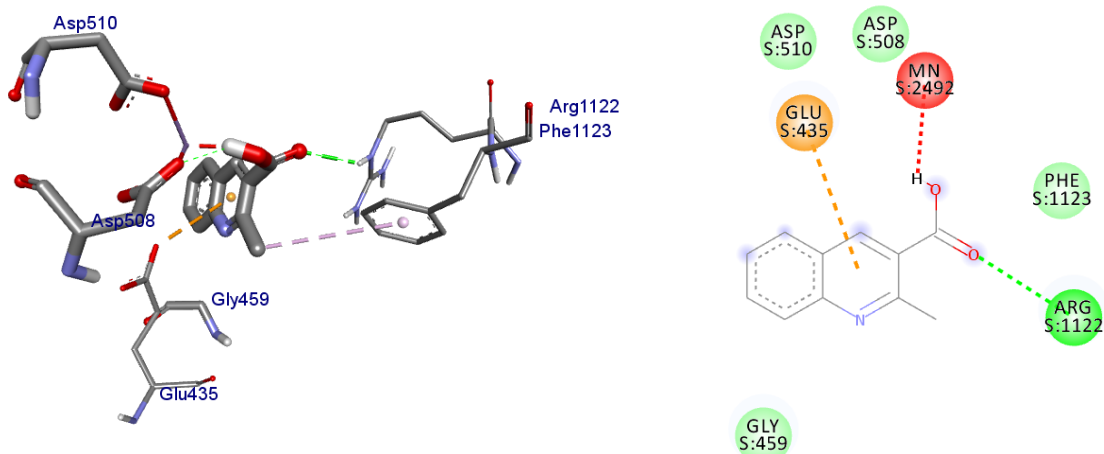

Fig 6. The binding interactions of compound **8** against *S. aureus* DNA gyrase (PDB ID: 2XCT).

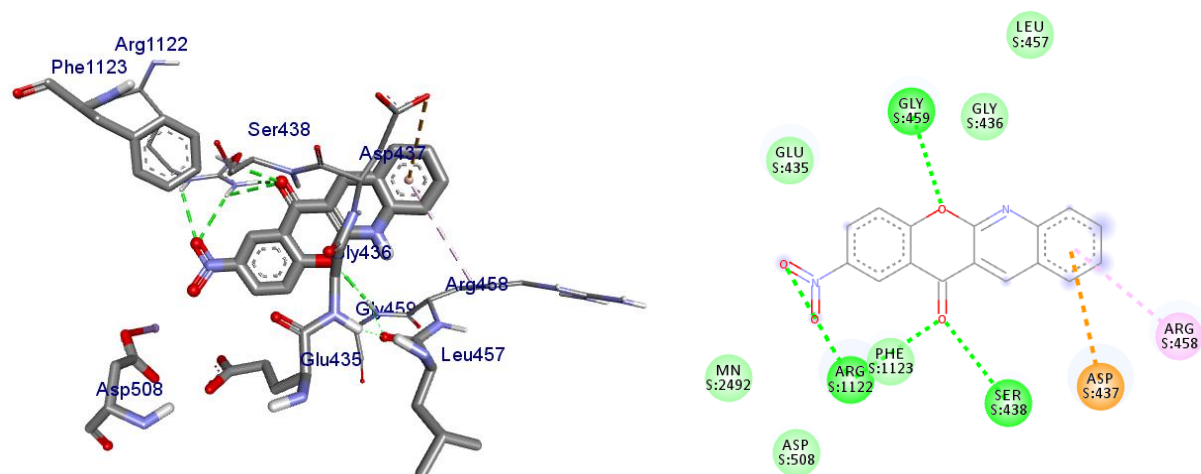

Fig 7. The binding interactions of compound **11** against *S. aureus* DNA gyrase (PDB ID: 2XCT).

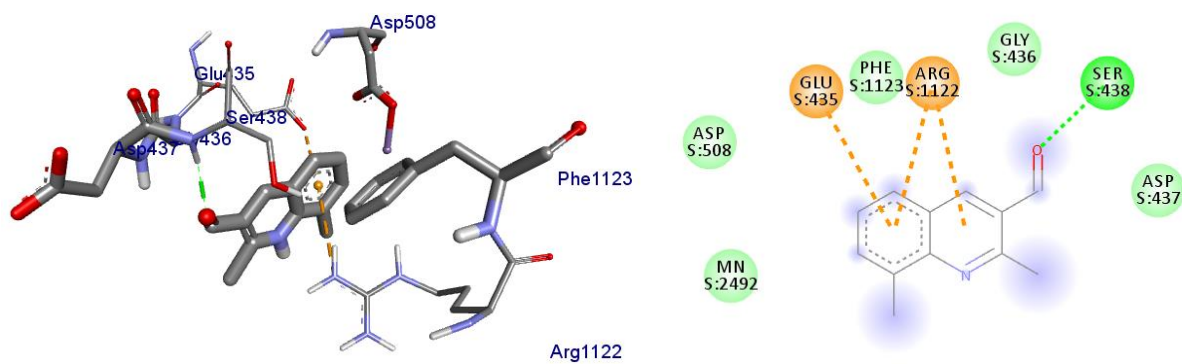

Fig 8. The binding interactions of compound **14** against *S. aureus* DNA gyrase (PDB ID: 2XCT).

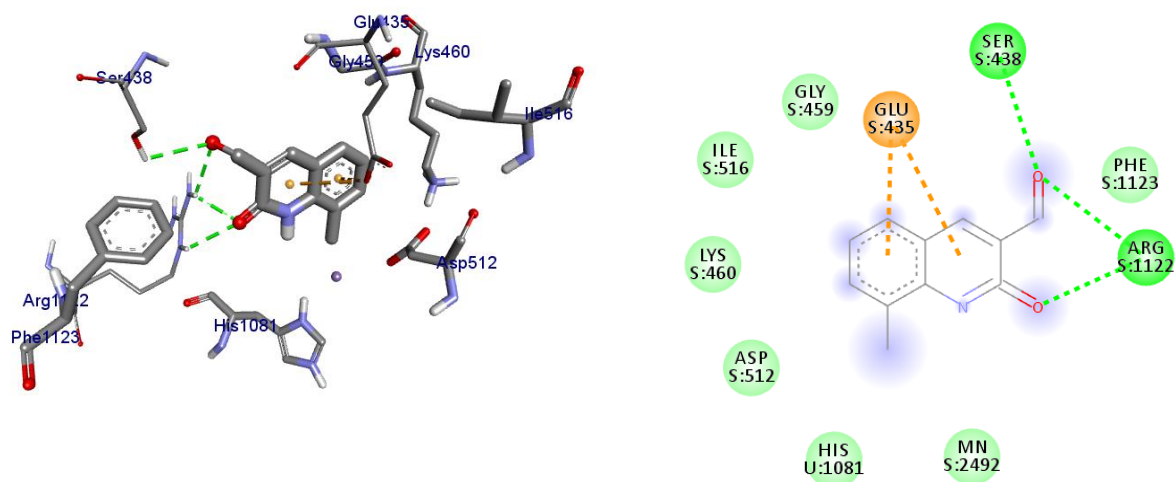

Fig 9. The binding interactions of compound **15** against *S. aureus* DNA gyrase (PDB ID: 2XCT).

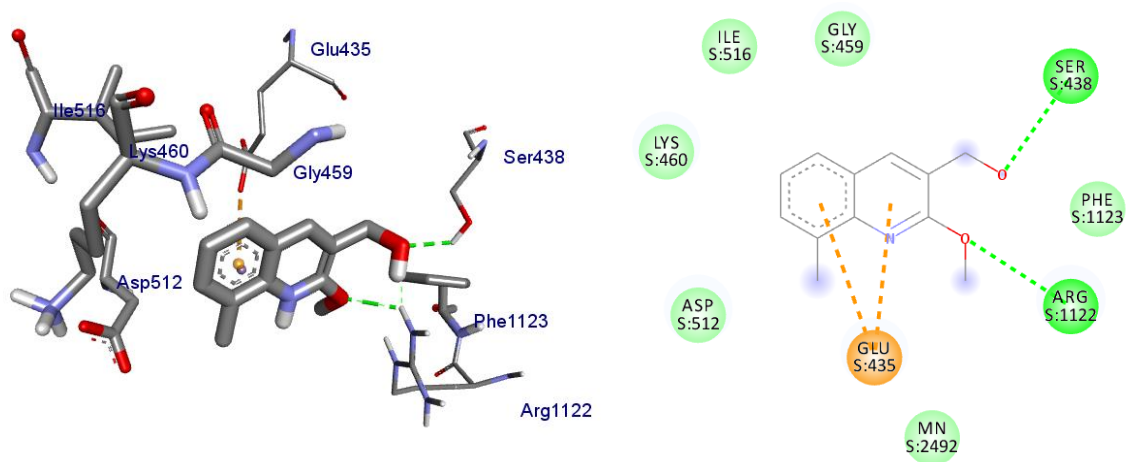

Fig 10. The binding interactions of compound **16** against *S. aureus* DNA gyrase (PDB ID: 2XCT).

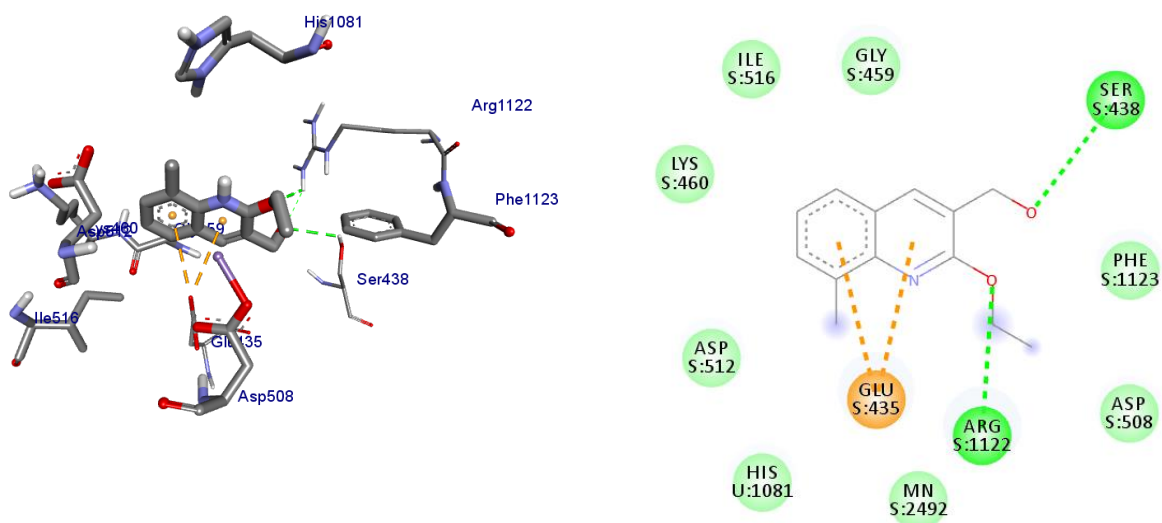

Fig 11. The binding interactions of compound 17 against *S. aureus* DNA gyrase (PDB ID: 2XCT).

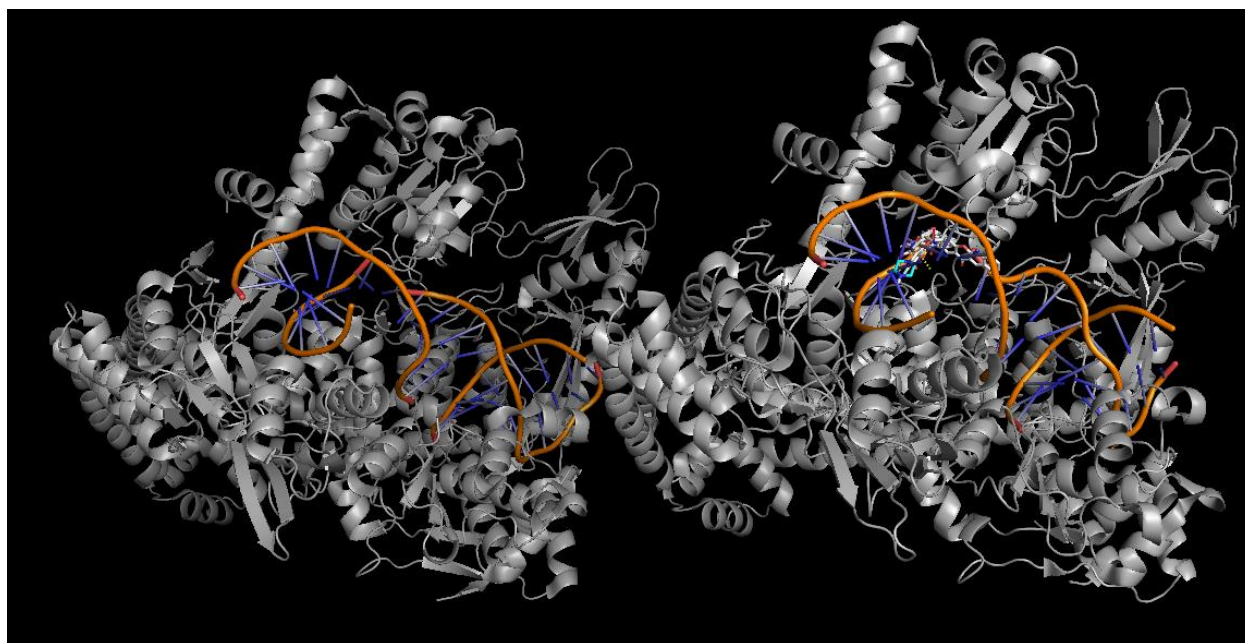

Fig 12. The binding interactions of all compounds (**4-17**) and Ciprofloxacin against *S. aureus* DNA gyrase (PDB ID: 2XCT).

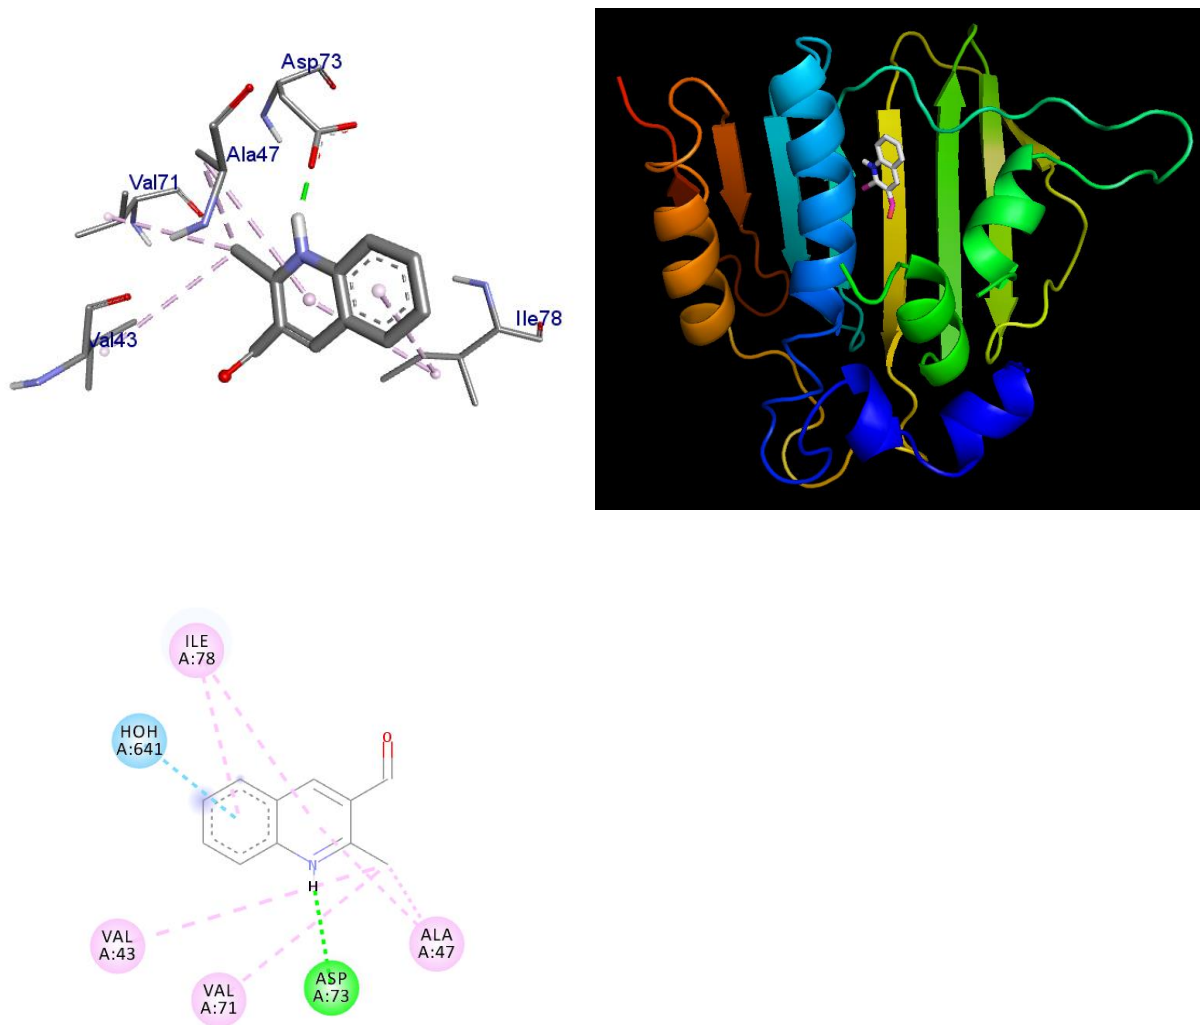

Fig 13. The binding interactions of compound **4** against *E.coli* DNA gyraseB (PDB ID: 6F86).

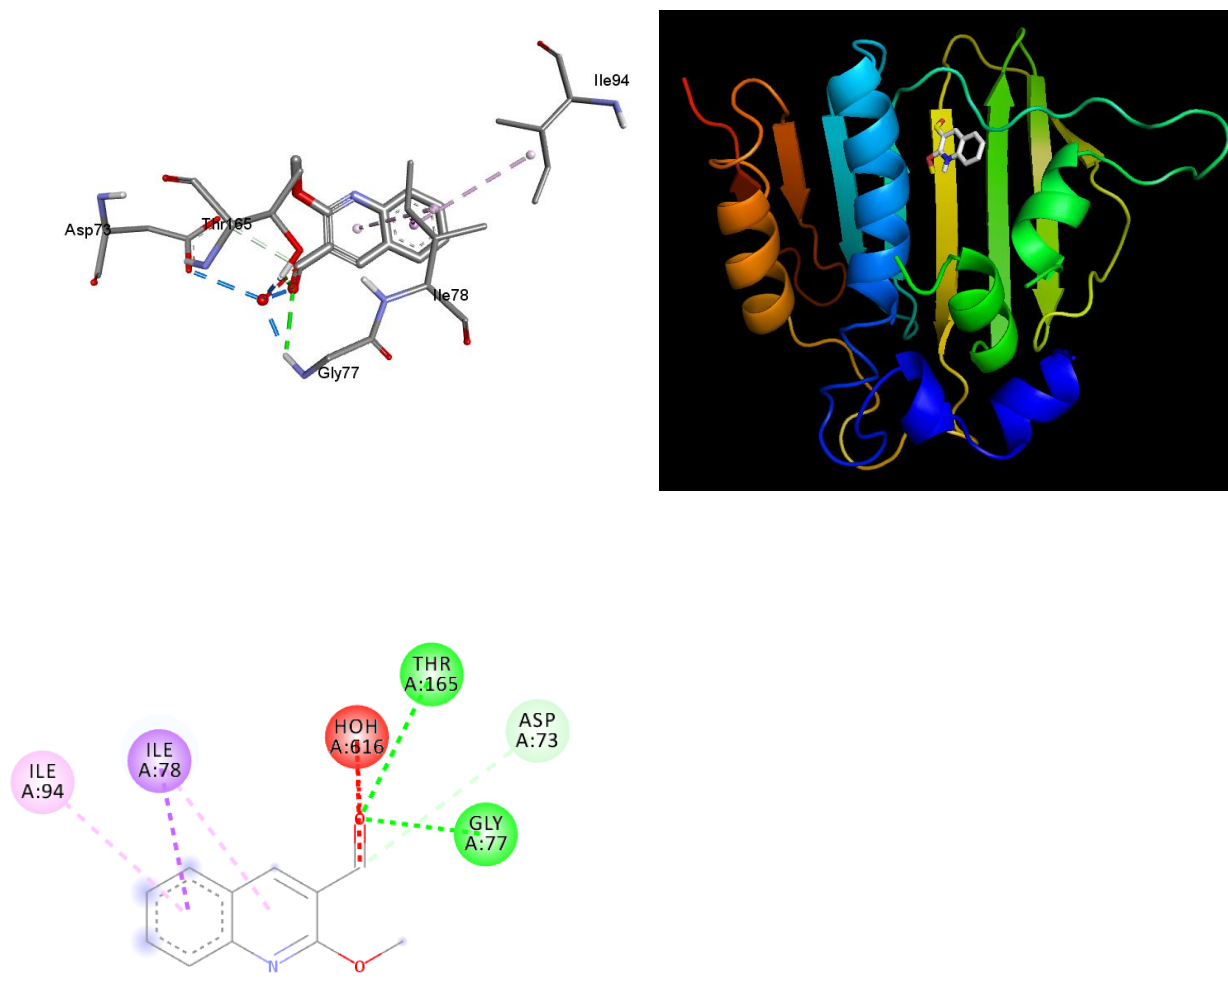

Fig 14. The binding interactions of compound 5 against *E.coli* DNA gyraseB (PDB ID: 6F86)

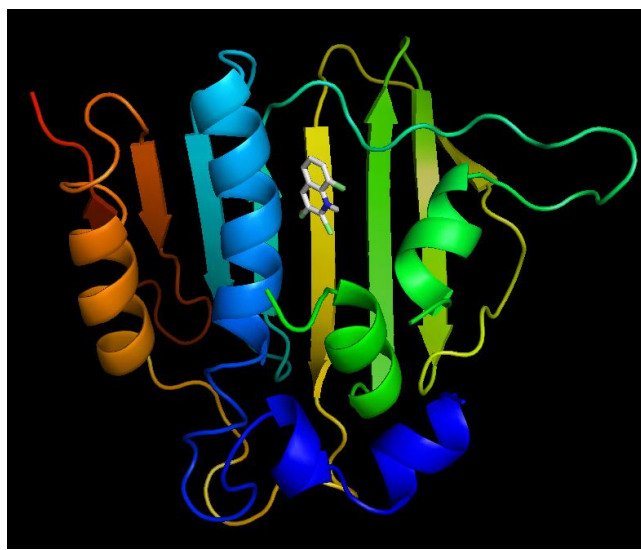

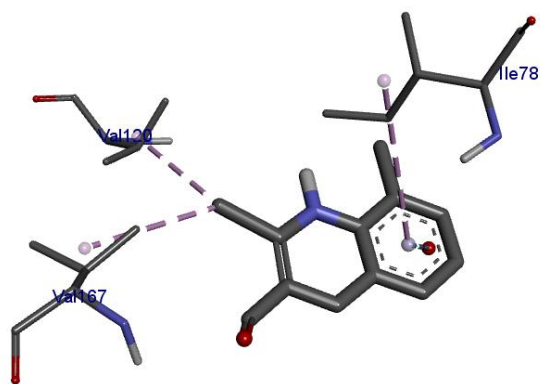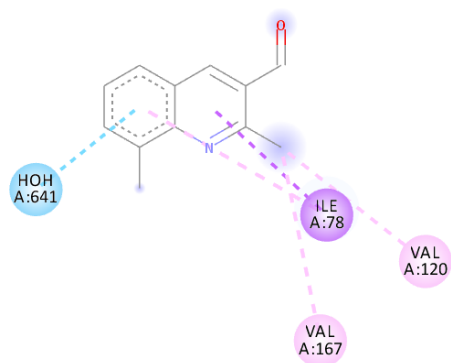

Fig 15. The binding interactions of compound **14** against *E.coli* DNA gyraseB (PDB ID: 6F86) .

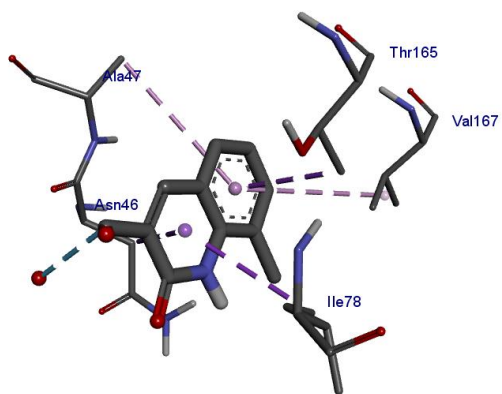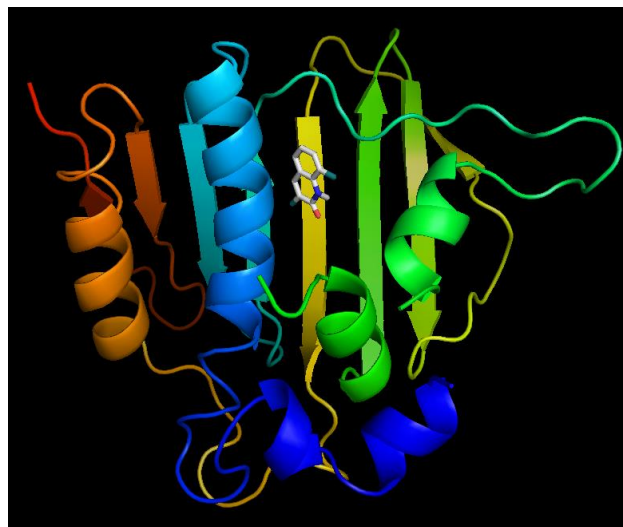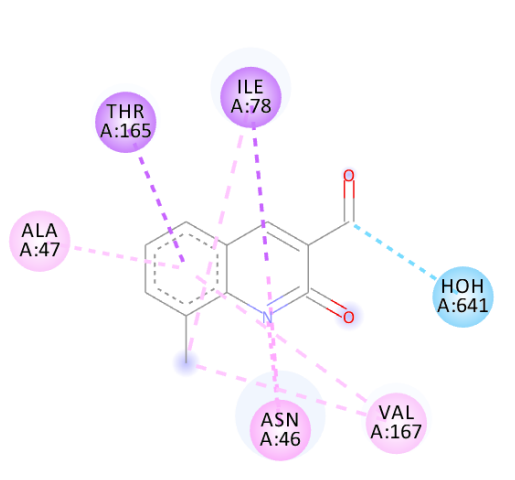

Fig 16. The binding interactions of compound **15** against *E.coli* DNA gyraseB (PDB ID: 6F86)

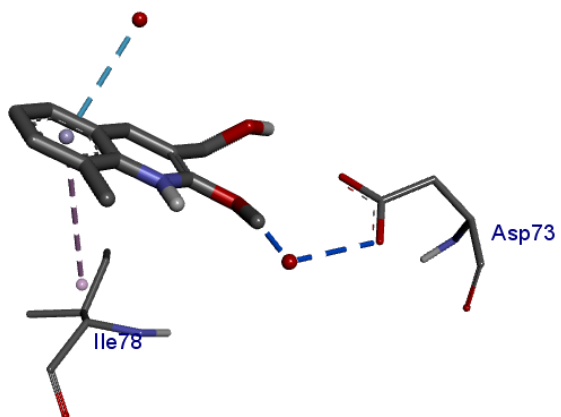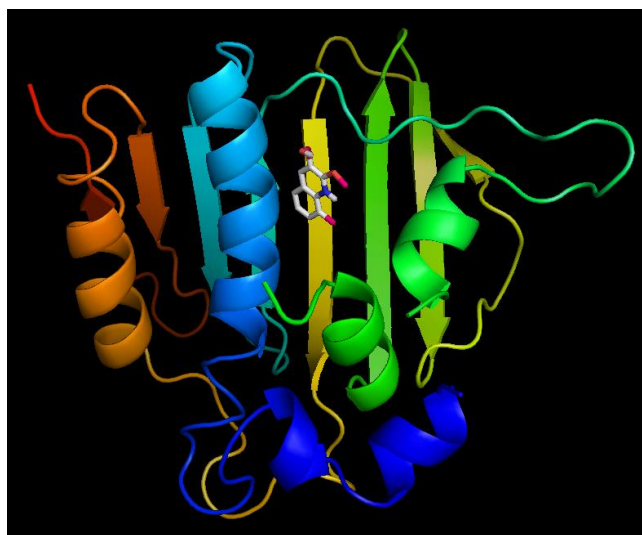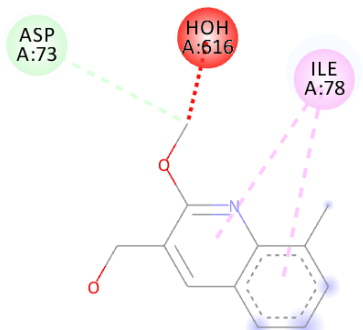

Fig 17. The binding interactions of compound **16** against *E.coli* DNA gyraseB (PDB ID: 6F86)
